# Supplementary material for: Caries risk assessment by Caries Management by Risk Assessment (CAMBRA) Protocol among the general population of Pakistan–a multicenter analytical study
Source: PeerJ. 2024 Jan 31;12:e16863. doi: 10.7717/peerj.16863 (PMC10838085; doi:10.7717/peerj.16863)
Supplement: Supplemental Information 1 [file peerj-12-16863-s001.xlsx]

## Sheet: Form Responses 1
Timestamp	Age	Gender	Locality	Education	Profession	Socioeconomic status	Visible cavities or radiographic penetration of the dentin	Radiographic approximal enamel lesions (not in dentin)	White spots on smooth surfaces	Restoration in the past three years	Visible heavy plaque on teeth	Frequent snack (> 3x daily between meals)	Deep pits and fissures	Use of recreational drugs	Inadequate saliva flow by observation	Saliva reducing factors	Type of saliva reducing factors	Exposed roots	Orthodontic appliances	Lives/work/school fluoridated community	Fluoride toothpaste at least once daily	Fluoride toothpaste at least 2x daily	Fluoride mouthrinse (0.05% NaF) daily	Fluoride varnish in last 6 months	Chlorhexidine prescribed/used one week each of last 6 months	Xylitol gum/lozenges 4x daily last 6 months	Calcium and phosphate paste during last 6 months	Keeping in view the above statements, the patient is having caries risk	@dropdown
2023-01-05 17:08:30	38	M	KPK	Higher secondary	Others	middle class	Yes	Yes	No	No	Yes	Yes	No	No	No	Yes	Medications	No	No	No	Yes	No	No	No	No	No	No	Moderate
2023-01-05 21:09:10	34	F	KPK	Bachelor	Teachers	Good	Yes	Yes	Yrs	Yes	No	Yes	Yes	No	No	No	No	Yes	No	Yes	Yes	No	No	No	No	No	No	Extreme High
2023-01-09 10:43:19	45	M	KPK	Master	Lawyer	Good	Yes	Yes	Yes	Yes	No	Yes	Yes	No	No	No	No	Yes	No	No	Yes	No	Yes	No	No	No	No	High
2023-01-09 11:26:14	30	M	KPK	Higher secondary	Businessman	Good	Yes	Yes	Yes	Yes	No	Yes	Yers	No	No	No	No	Yes	No	Yes	Np	No	No	No	No	No	No	High
2023-01-09 11:27:39	23	F	KPK	Higher secondary	Teacher	Good	Yes	No	Yes	No	Yes	Yes	Yes	No	Yes	Yes	Medications	No	No	Yes	No	Yes	No	Yes	No	No	Yes	High
2023-01-10 08:23:22	22	M	KPK	Secondary	Business man/woman	Poor	Yes	Yes	No	Yes	Yes	Yes	Yes	Yes	No	No	No	No	No	Yes	No	No	No	No	No	No	No	Extremely high
2023-01-10 15:37:49	21	F	KPK	Higher secondary	Student	Poor	Yes	Yes	Yes	Yes	Yes	Yes	Yes	No	No	No	No	No	No	No	No	No	No	No	No	No	No	Extremely high
2023-01-10 15:40:07	32	M	KPK	Bachelor	Teacher	Lower Middle	Yes	No	No	No	No	Yes	Yes	No	Yes	Yes	Systemic illness	No	No	No	Yes	No	No	No	Yes	No	Yes	Moderate
2023-01-12 08:48:53	56	M	KPK	Secondary	Others	Lower Middle	Yes	Yes	No	Yes	No	No	No	No	No	No	No	Yes	No	No	No	No	No	No	No	No	No	High
2023-01-12 10:08:37	60	M	KPK	Secondary	Others	Lower Middle	Yes	Yes	No	Yes	No	Yes	No	Yes	No	No	No	No	No	No	No	No	No	No	No	No	No	Moderate
2023-01-12 14:36:56	25	F	KPK	Bachelor	Teacher	Satisfactory	Yes	Yes	No	Yes	No	Yes	Yes	No	No	No	No	No	No	Yes	No	No	No	No	No	Yes	Yes	Moderate
2023-01-14 17:06:29	64	M	KPK	Secondary	Others	Poor	Yes	Yes	No	No	Yes	No	Yes	No	Yes	Yes	Systemic illness	Yes	No	No	No	No	No	No	No	No	No	Extremly High
2023-01-14 17:08:21	39	F	KPK	Bachelor	Teacher	Middle	Yes	Yes	No	No	Yes	Yes	No	No	No	Yes	Systemic illness	No	No	No	No	No	No	No	No	No	No	Moderate
2023-01-14 17:11:11	7	M	KPK	Primary	Student	Middle	No	Yes	Yes	No	No	Yes	Yes	No	No	No	No	No	No	Yes	Yes	Yes	Yes	Yes	Yes	Yes	Yes	Low
2023-01-14 17:13:42	38	F	KPK	Others	Doctor	Middle	No	Yes	Yes	Yes	No	No	Yes	No	No	No	No	No	No	Yes	Yes	Yes	Yes	Yes	No	No	Yes	Low
2023-01-14 17:24:27	6	M	KPK	Primary	Student	High	No	No	No	No	No	Yes	No	No	No	No	No	No	No	Yes	Yes	No	No	No	No	No	Yes	Low
2023-01-14 17:27:22	25	F	KPK	Master	Student	High	No	No	No	No	No	No	Yes	No	No	No	No	No	Yes	Yes	Yes	Yes	No	No	No	No	Yes	Low
2023-01-14 17:30:42	8	F	KPK	Primary	Student	Middle	Yes	No	Yes	No	No	Yes	No	No	No	No	No	No	No	Yes	Yes	No	No	No	No	No	Yes	Low
2023-01-14 17:34:25	11	M	KPK	Primary	Student	High	Yes	Yes	No	No	No	Yes	Yes	No	No	No	No	No	Yes	Yes	Yes	No	No	No	No	No	Yes	Moderate
2023-01-14 17:38:01	9	M	KPK	Primary	Student	Middle	Yes	No	No	No	No	No	No	No	No	No	No	No	No	Yes	Yes	No	No	No	No	No	Yes	Low
2023-01-14 17:45:09	18	M	KPK	Higher secondary	Student	Middle	Yes	No	Yes	No	Yes	Yes	Yes	No	No	No	No	No	Yes	Yes	Yes	No	No	No	No	No	Yes	Moderate
2023-01-14 17:48:03	9	M	KPK	Primary	Student	Middle	Yes	No	Yes	No	No	Yes	Yes	No	No	No	No	No	No	Yes	Yes	Yes	Yes	Yes	No	No	Yes	Low
2023-01-14 17:53:22	10	M	KPK	Primary	Student	Middle	Yes	No	No	No	No	No	Yes	No	No	No	No	No	No	Yes	Yes	No	No	No	No	No	No	Low
2023-01-14 17:59:09	12	F	KPK	Secondary	Student	Middle	No	No	No	No	No	Yes	Yes	No	No	No	Systemic illness	No	No	Yes	Yes	No	No	No	No	No	Yes	Low
2023-01-14 18:01:46	13	M	KPK	None	Student	Middle	Yes	No	Yes	No	No	Yes	Yes	No	No	No	No	No	Yes	No	Yes	No	No	No	No	No	No	Moderate
2023-01-14 18:06:28	9	M	KPK	Primary	Student	Middle	Yes	No	No	No	No	Yes	No	No	No	No	No	No	No	Yes	Yes	No	No	No	No	No	Yes
2023-01-14 18:09:33	8	M	KPK	Primary	Student	Middle	Yes	No	No	No	No	Yes	Yes	No	No	No	No	No	No	No	No	No	No	No	No	No	Yes	Moderate
2023-01-14 18:11:51	8	M	KPK	Primary	Student	Poor	Yes	Yes	No	No	No	Yes	Yes	No	No	No	No	No	No	No	No	No	No	No	No	No	No	High
2023-01-14 18:15:02	12	F	KPK	Secondary	Student	Low	Yes	No	Yes	No	No	No	Yes	No	No	No	No	No	No	No	No	No	No	No	No	No	No	High
2023-01-14 18:18:17	9	F	KPK	Primary	Student	High	Yes	No	No	No	No	Yes	No	No	No	No	No	No	No	Yes	Yes	No	No	No	No	No	No	Low
2023-01-14 18:23:26	8	F	KPK	Primary	Student	High	Yes	No	No	No	No	Yes	No	No	No	No	No	No	No	Yes	No	No	No	No	No	No	No	Moderate
2023-01-14 19:24:18	10	F	KPK	Primary	Student	Middle	Yes	No	Yes	No	No	No	Yes	No	No	No	No	No	No	No	No	No	No	No	No	No	No	High
2023-01-14 19:28:37	12	M	Punjab	Primary	Student	Low	Yes	No	Yes	No	Yes	No	Yes	No	No	No	No	No	No	No	No	No	No	No	No	No	No	High
2023-01-14 19:32:26	7	M	Punjab	Primary	Student	Middle	Yes	No	No	No	No	Yes	Yes	No	No	No	No	No	No	Yes	Yes
2023-01-14 19:34:18	11	M	Punjab	Primary	Student	Poor	Yes	No	Yes	No	No	No	Yes	No	No	No	No	No	No	No	No	No	No	No	No	No	No	Extremely high
2023-01-14 19:47:15	20	F	Punjab	Others	Others	Poor	Yes	Yes	Yes	No	Yes	No	Yes	No	No	No	No	No	No	No	Yes	No	No	No	No	No	No	High
2023-01-14 19:49:16	23	M	Punjab	None	Others	Poor	Yes	Yes	Yes	No	Yes	No	Yes	No	No	No	No	No	No	No	No	No	No	No	No	No	Yes	High
2023-01-14 19:51:33	27	F	Punjab	Primary	Others	Middle	Yes	No	Yes	No	Yes	No	Yes	No	No	No	No	No	No	No	No	No	No	No	No	No	Yes	High
2023-01-14 19:53:40	27	M	Punjab	Bachelor	Student	High	Yes	No	No	Yes	No	Yes	Yes	No	No	No	No	No	No	No	Yes	No	No	No	No	No	Yes	Moderate
2023-01-14 19:56:41	40	F	Punjab	Higher secondary	Others	Middle	Yes	No	Yes	Yes	Yes	Yes	Yes	No	No	No	No	No	No	No	No	No	No	No	No	No	Yes	High
2023-01-14 19:59:04	35	M	Punjab	Primary	Others	Poor	Yes	Yes	Yes	No	Yes	No	Yes	No	No	No	No	No	No	No	No	No	No	No	No	No	Yes	High
2023-01-14 20:02:13	20	M	Punjab	Bachelor	Student	Middle	Yes	Yes	No	Yes	Yes	Yes	Yes	No	No	No	No	No	No	Yes	No	No	No	No	No	No	Yes	High
2023-01-14 20:03:53	27	F	Punjab	Secondary	Others	Poor	Yes	Yes	No	No	Yes	No	Yes	No	No	No	No	No	No	No	No	No	No	No	No	No	No	Extremely high
2023-01-14 20:07:31	41	M	Punjab	Master	Student, Teacher	Middle	Yes	No	No	Yes	No	Yes	Yes	No	No		No	No	No	Yes	Yes		Yes	No	No	No	Yes	Moderate
2023-01-14 20:09:40	33	F	Punjab	None	Others	Poor	Yes	Yes	No	No	Yes	No	Yes	No	No	No	No	No	No	No	No	No	No	No	No	No	No	Extremely high
2023-01-14 20:16:30	56	F	Punjab	Secondary	Others	High	Yes	Yes	No	Yes	Yes	No	Yes	No	Yes	Yes	Medications	Yes	No	Yes	Yes	No	No	No	No	No	No	High
2023-01-14 20:19:00	36	F	Punjab	Bachelor	Others	High	Yes	Yes	No	No	Yes	No	No	No	No	No	No	No	No	Yes	Yes	No	No	No	No	No	No	Moderate
2023-01-14 20:22:02	29	M	Punjab	Master	Business man/woman	High	Yes	No	No	Yes	Yes	No	No	No	No	No	No	No	No	Yes	No	No	No	No	No	No	Yes	Moderate
2023-01-14 20:25:06	14	M	Punjab	Secondary	Student	High	Yes	No	No	No	No	Yes	Yes	No	No	No	No	No	No	Yes	No	No	No	No	No	No	Yes	Moderate
2023-01-14 20:28:06	40	F	Punjab	Bachelor	Others	Middle	Yes	No	No	No	Yes	Yes	Yes	No	No	No	No	No	No	No	No	No	No	No	No	No	No	High
2023-01-14 20:32:27	65	M	Punjab	Bachelor	Others	Middle	No	Yes	No	No	No	No	Yes	No	Yes	Yes	Medications	No	No	Yes	No	No	No	No	No	No	No	High
2023-01-14 20:35:56	47	M	Punjab	Higher secondary	Business man/woman	Middle	Yes	No	No	Yes	Yes	Yes	Yes	No	No	No	No	No	No	Yes	Yes	No	No	No	No	No	Yes	Moderate
2023-01-14 20:38:53	19	M	Punjab	Secondary	Student	Middle	Yes	No	No	Yes	No	No	Yes	No	No	No	No	No	No	Yes	Yes	No	No	No	No	No	Yes	Moderate
2023-01-14 20:51:46	24	F	Punjab	Bachelor	Doctor	Middle	No	No	No	No	No	Yes	No	No	No	No	No	No	No	Yes	Yes	No	No	No	No	No	Yes	Low
2023-01-14 20:54:27	25	F	Punjab	Bachelor	Teacher	Midddle	Yes	No	No	Yes	No	Yes	No	No	No	No	No	No	No	No	No	No	No	No	No	No	Yes	High
2023-01-14 21:04:26	46	F	Punjab	Secondary	Others	Low	No	Yes	Yes	No	No	No	Yes	No	Yes	No	No	Yes	No	Yes	Yes	No	No	Yes	No	Yes	No	Moderate
2023-01-14 21:07:16	46	F	Punjab	Bachelor	Teacher	Middle	No	Yes	No	Yes	No	Yes	No	No	Yes	No	No	Yes	No	No	Yes	No	No	No	No	No	No	High
2023-01-14 21:09:20	20	M	Punjab	Higher secondary	Student	Higj	No	No	Yes	No	No	Yes	No	No	No	No	No	No	No	Yes	Yes	No	No	No	No	No	Yes	Low
2023-01-14 21:13:11	40	F	Punjab	Bachelor	Others	Middle	Yes	Yes	No	Yes	No	No	Yes	No	No	No	No	No	No	Yes	No	No	No	No	No	No	No	Moderate
2023-01-14 21:17:12	41	F	Punjab	Secondary	Teacher	Middle	Yes	Yes	No	Yes	No	No	Yes	No	No	No	No	No	No	Yes	No	No	No	No	No	No	Yes	Moderate
2023-01-14 23:08:21	35	M	Punjab	Secondary	Others	middle	Yes	No	No	Yes	Yes	No	Yes	No	No	No	No	No	No	No	Yes	No	No	No	No	No	Yes	Moderate
2023-01-14 23:10:38	6	M	Punjab	Secondary	Student	High	Yes	No	Yes	No	Yes	Yes	No	No	No	No	No	No	No	No	Yes	No	No	No	No	No	No	High
2023-01-14 23:13:15	27	M	Punjab	Bachelor	Business man/woman, Others	middle	No	No	Yes	No	Yes	No	Yes	No	No	No	No	No	No	Yes	Yes	No	No	No	No	No	No	Moderate
2023-01-14 23:16:03	21	F	Punjab	Bachelor	Doctor	High	No	No	Yes	No	Yes	No	Yes	No	No	No	No	No	No	Yes	Yes	No	No	No	No	No	No	Moderate
2023-01-14 23:18:50	20	M	Punjab	Bachelor	Student	middle	No	No	No	No	Yes	Yes	No	No	No	No	No	No	No	No	Yes	No	No	No	No	No		Moderate
2023-01-14 23:21:11	54	M	Punjab	Primary	Others	low	No	No	No	Yes	Yes	No	Yes	No	No	No	Systemic illness	No	No	No	No	No	No	No	No	No	No	Moderate
2023-01-14 23:23:22	22	M	Punjab	Bachelor	Student	Middle	No	No	No	Yes	Yes	No		No	No	No	No	No	No	Yes	No	No	No	No	No	No	Yes	Moderate
2023-01-14 23:25:33	29	M	Punjab	Bachelor	Others	middle	Yes	No	No	No	No	No	Yes	No	No	No	No	No	No	No	Yes	No	No	No	No	No	Yes	Moderate
2023-01-14 23:27:43	59	M	Punjab	Higher secondary	Teacher	Middle	Yes	Yes	No	Yes		Yes	No	No	No	No	No	No	No	No	No	No	No	No	No	No	No	High
2023-01-14 23:31:14	30	M	Punjab	Primary	Others	low	Yes	Yes	Yes	No	Yes	No	Yes	No	No	No	No	No	No	No	No	No	No	No	No	No	No	High
2023-01-14 23:33:04	54	M	Punjab	None	Others	low	Yes	Yes	No	Yes	Yes	No	Yes	No	No	No	No	No	No	No	No	No	No	No	No	No	No	High
2023-01-14 23:34:58	17	F	Punjab	Higher secondary	Student	Middle	No	Yes	No	No	No	No	No	No	No	No	No	No	No	Yes	Yes	No	Yes	No	No	No	Yes	Low
2023-01-14 23:37:09	24	M	Punjab	Master	Student	middle	No	No	No	No	Yes	Yes	No	No	No	No	No	No	No	Yes	Yes	No	No	No		No	No	Moderate
2023-01-14 23:39:08	28	F	Punjab	Secondary	Others	Middle	Yes	Yes	No	Yes	No	Yes	Yes	No	No	No	No	No	No	No	Yes	No	No	No	No	No	No	Moderate
2023-01-14 23:42:28	40	M	Punjab	Primary	Others	Poor	Yes	Yes	No	Yes	Yes	No	Yes	No	No		No	No	No	No	No	No	No	No	No	No	No	High
2023-01-14 23:44:34	20	F	Punjab	Secondary	Student	Middle	Yes	No	No	Yes	No	Yes	Yes	No	No	No	No	No	No	Yes	Yes	No	No	No	No	No	No	Moderate
2023-01-14 23:46:44	25	M	Punjab	Bachelor	Teacher	Middle	Yes	No	No	Yes	No	Yes	Yes	No	No	No	No	No	No	Yes	Yes	No	No	No	No	No	No	Moderate
2023-01-14 23:49:20	40	M	Punjab	Higher secondary	Business man/woman	Middle	Yes	Yes	No	Yes	Yes	No	Yes	No	No	No	No	No	No	No	No	No	No	No	No	No	No	High
2023-01-14 23:52:06	35	F	Punjab	None	Others	middle	Yes	No	No	No	Yes	Yes	No	No	No	No	No	No	No	Yes	Yes	No	No	No	No	No	No	Moderate
2023-01-14 23:54:41	25	M	Punjab	Master	Student	Middle	Yes	Yes	No	No	No	Yes	Yes	No	No	No	No	No	No	Yes	Yes	No	No	No	No	No	No	Moderate
2023-01-14 23:57:18	55	F	Punjab	Higher secondary	Others	middle	Yes	Yes	No	Yes	No	Yes	No	No	No	No	No	No	No	Yes	Yes	No	No	No		No	No	Moderate
2023-01-16 09:21:20	23	F	Punjab	Bachelor	Student	Middle Class/ Stable	Yes	Yes	No	Yes	No	Yes	Yes	No	No	No	No	No	No	No	Yes	Yes	No	No	No	No	Yes	Moderate
2023-01-16 15:02:00	25	M	Punjab	None	Others	Low	Yes	No	No	Yes	No	No	Yes	No	No	No	No	No	No	No	Yes	No	No	No	No	No	No	Moderate
2023-01-16 15:04:21	45	F	Punjab	Secondary	Others	Poor	No	Yes	No	Yes	No	No	Yes	No	No	No	No	No	No	No	Yes	No	No	No	Yes	No	No	Moderate
2023-01-16 15:06:26	32	M	Punjab	Primary	Others	Low	Yes	No	No	Yes	No	No	Yes	No	No	No	No	No	No	No	Yes	No	No	No	No	No	Yes	Moderate
2023-01-16 15:08:23	32	F	Punjab	Secondary	Others	Low	No	Yes	No	Yes	No	No	Yes	No	No	No	No	No	No	No	Yes	No	No	No	No	No	No	Moderate
2023-01-16 15:09:48	45	F	Punjab	Secondary	Others	Poor	Yes	Yes	No	Yes	No	No	Yes	No	No	No	No	No	No	No	Yes	No	No	No	No	No	No	Moderate
2023-01-16 15:11:29	15	F	Punjab	Secondary	Others	Low	No	Yes	No	Yes	Yes	No	Yes	No	No	No	No	No	No	No	Yes	Yes	No	No	No	No	No	Moderate
2023-01-16 15:14:18	14.4	F	Punjab	Secondary	Student	Middle	Yes	No	No	No	No	Yes	Yes	No	No	No	No	No	No	Yes	Yes	No	No	No	No	No	No	Moderate
2023-01-16 15:15:47	29	F	Punjab	Master	Others	Middlee	Yes	Yes	No	No	No	Yes	Yes	No	No	No	No	No	No	Yes	Yes	No	No	No	No	No	No	Moderate
2023-01-16 15:17:41	23.2	F	Punjab	Master	Student	Middle	No	No	No	No	No	Yes	No	No	No	No	No	No	Yes	Yes	Yes	Yes	Yes	No	Yes	No	Yes	Low
2023-01-16 15:19:08	20	F	Punjab	Bachelor	Student	High	Yes	No	No	No	No	No	Yes	No	No	No	No	No	Yes	Yes	Yes	Yes	No	No	No	No	No	Moderate
2023-01-16 15:20:47	23.2	F	Punjab	Higher secondary	Student	Middle	Yes	Yes		Yes	Yes	No	No	No	No	No	No	No	Yes	Yes	Yes	No	No	No	No	No	No	Moderate
2023-01-16 15:22:46	40	F	Punjab	Others	Others	Middle	Yes	Yes	No	Yes	Yes	Yes	No	No	No	No	No	No	No	No	Yes	No	No	No	No	No	No	High
2023-01-16 15:24:21	55	F	Punjab	Primary	Others	Middle	Yes	Yes	No	Yes	Yes	Yes	No	No	No	No	No	No	No	No	Yes	No	No	No	No	No	No	High
2023-01-16 15:25:45	31	F	Punjab	Master	Teacher	Middle	Yes	Yes	No	No	Yes	No	No	No	No	No	No	No	No	Yes	Yes	No	No	No	No	No	No	Moderate
2023-01-16 15:27:47	14	M	Punjab	Secondary	Student	Middle	No	No	Yes	No	Yes	No	Yes	No	No	No	No	No	No	Yes	Yes	No	No	No	No	No	No	Moderate
2023-01-16 15:29:39	40	F	Punjab	Master	Student	Middle	Yes	Yes	No	No	Yes	No	No	No	No	No	No	No	No	Yes	Yes	No	No	No	No	No	No	Moderate
2023-01-16 15:31:15	21	F	Punjab	Bachelor	Student	Middle	Yes	Yes	No	No	No	Yes	Yes	No	No	No	No	No	No	Yes	Yes	No	No	No	No	No	No	Moderate
2023-01-16 16:58:06	47	M	Punjab	Secondary	Others	Poor		Yes	No	No	Yes	Yes	No	No	No	No	No	No	No	No	Yes	No	No	No	No	No	No	High
2023-01-16 17:19:18	30	F	Punjab	Bachelor	Others	Average	Yes	Yes	No	Yes	Yes	Yes	No	Yes	No	No	Systemic illness	No	No	Yes	Yes	No	No	No	Yes	No	No	Moderate
2023-01-16 17:21:40	37	F	Punjab	Master	Others	Average	Yes	Yes	No	Yes	Yes	Yes	No	No	No	No	Systemic illness	Yes	No	Yes	Yes	Yes	No	No	No	No	No	Moderate
2023-01-16 17:23:52	25	F	Punjab	Bachelor	Student	Average	Yes	Yes	No	Yes	No	No	No	No	No	No	Medications	No	No	Yes	Yes	No	No	No	No	No	No	Moderate
2023-01-16 17:25:12	26	M	Punjab	Secondary	Others	Shopkeeper	Yes	Yes	No	No	Yes	No	No	No	No	No	Systemic illness	No	No	Yes	Yes	No	No	No	No	No	No	Moderate
2023-01-16 17:26:22	15	F	Punjab	Secondary	Student	Student	Yes	Yes	No	No	No	Yes	No	No	No	No	Medications	No	No	Yes	Yes	Yes	No	No	No	No	No	Moderate
2023-01-16 17:33:19	28	F	Punjab	Master	Others	Middle	Yes	Yes	No	Yes	No	No	No	No	No	No	Medications	No	No	Yes	Yes	Yes	No	No	No	No	No	Moderate
2023-01-16 17:34:15	38	F	Punjab	Secondary	Others	Middle	Yes	Yes	No	Yes	Yes	No	No	No	No	No	Systemic illness	Yes	No	Yes	Yes	No	No	No	No	No	No	Moderate
2023-01-16 17:36:52	36	M	Punjab	Bachelor	Business man/woman	Middle	Yes	Yes	No	Yes	Yes	No	No	No	No	No	Medications	Yes	No	Yes	Yes	No	No	No	No	No	No	High
2023-01-16 17:38:11	19	F	Punjab	Bachelor	Student	Middle	Yes	Yes	No	No	No	No	No	No	No	No	Systemic illness	No	No	Yes	Yes	No	No	No	No	No	No	Moderate
2023-01-16 17:39:20	20	F	Punjab	Bachelor	Student	Middle	Yes	Yes	No	Yes	No	Yes	No	No	No	No	Medications	No	No	Yes	Yes	Yes	No	No	Yes	No	No	Moderate
2023-01-16 19:13:47	37	F	Punjab	Secondary	House wife	Middle	Yes	No	Yes	Yes	Yes	Yes	No	Yes	No	Yes	Systemic illness	Yes	Yes	Yes	Yes	No	No	Yes	No	Yes	Yes	Low
2023-01-16 19:15:18	22	M	Punjab	Primary	Doctor	High	Yes	No	Yes	Yes	No	Yes	No	No	Yes	No	Medications	No	Yes	Yes	Yes	No	Yes	No	Yes	Yes	No	Low
2023-01-16 19:16:33	26	F	Punjab	Higher secondary	Engineer	Midle	No	No	Yes	No	No	Yes	No	No	Yes	Yes	Medications	No	Yes	No	Yes	No	No	No	No	Yes	Yes	Low
2023-01-16 19:17:43	35	F	Punjab	Primary	House wife	Middle	Yes	Yes	No	Yes	No	Yes	Yes	No	No	Yes	Systemic illness	Yes	No	No	Yes	No	No	No	No	No	No	Extremly High
2023-01-16 19:19:07	35	M	Punjab	Bachelor	Lawyer	Middle	No	No	No	No	No	Yes	No	No	No	No	Systemic illness	No	No	Yes	Yes	Yes	Yes	No	Yes	Yes	Yes	Low
2023-01-16 19:20:09	37	M	Punjab	Bachelor	Doctor	High	No	No	No	Yes	No	No	No	No	No	No	No	No	No	No	Yes	Yes	Yes	Yes	Yes	Yes	Yes	Low
2023-01-16 19:21:17	36	F	Punjab	Bachelor	Doctor	High	No	No	No	No	No	No	No	No	No	No	No	No	No	Yes	Yes	Yes	Yes	No	Yes	Yes	Yes	Low
2023-01-16 19:22:54	38	M	Punjab	Bachelor	Lawyer	High	No	No	No	No	No	No	No	No	No	No	No	No	No	Yes	Yes	Yes	Yes	No	Yes	Yes	Yes	Low
2023-01-16 19:23:54	37	F	Punjba	Secondary	House wife	Middle	No	No	No	Yes	No	No	No	No	Yes	Yes	Systemic illness	Yes	No	No	Yes	No	No	No	No	No	No	Moderate
2023-01-16 19:26:58	45	F	Punjab	Bachelor	Teacher	Middle	No	No	No	No	No	No	No	No	No	Yes	Systemic illness	Yes	No	No	Yes	Yes	No	No	No	No	No	Moderate
2023-01-16 20:35:23	23	F	Punjab	Secondary	Student	Good	Yes	Yes	Yes	No	Yes	Yes	Yes		Yes	Yes	Systemic illness	No	No	No	Yes	No	No	No	No	No	No	High
2023-01-16 20:41:05	25	F	Punjab	Master	Teacher	Good	Yes	No	No	No	Yes	Yes	No		No	No	No	No	Yes	No	Yes	Yes	No	No	No	No	No	Moderate
2023-01-16 20:44:24	23	F	Punjab	Master	Student	Good	Yes	Yes	No	No	Yes	Yes	No	No	No	No	No	No	Yes	No		Yes	No	No	No	No	No	Moderate
2023-01-16 20:50:38	30	F	Punjab	Bachelor	Others	Good	Yes	Yes	No	No	Yes	Yes	Yes	No	No	No	No	No	No	Yes	Yes	No	No	No	No	No	No	Moderate
2023-01-16 20:53:59	11	F	Punjab	Primary	Student	Good	No	Yes	No	No	No	Yes	Yes	No	No	No	No	No	No	No	Yes	No	No	No	No	No	No	Low
2023-01-16 21:43:44	52	M	Punjab	None	Others	Poor	Yes	Yes	Yes	Yes	Yes	Yes	Yes	No	Yes	Yes	Systemic illness	Yes	No	No	No	No	No	No	No	No	No	Extremly High
2023-01-16 21:46:48	32	M	Punjab	Bachelor	Others	Good	Yes	Yes	Yes			Yes		Yes			No				Yes					Yes	Yes	Moderate
2023-01-16 21:48:53	23	F	Punjab	Bachelor	Student	Good	Yes	Yes	Yes				Yes				No				Yes			No				Low
2023-01-16 21:52:27	16	F	Punjab	Bachelor	Student	Good	No	No	No	Yes	No	Yes	No	No	Yes	No	No	Yes		No	Yes	No			No	No	No	Moderate
2023-01-16 21:55:03	42	M	Punjab	Ph.D	Student	Good	No	Yes	No	Yes	No	Yes	No	No	No	Yes	No	No	No		Yes	No	No	No	Yes	No	No	Moderate
2023-01-16 21:57:54	22	M	Punjab	Bachelor	Student	Poor	No	Yes	No	Yes	No	No	Yes	No	Yes	No	No	Yes	No		Yes	No	No	No	No	No	No	Moderate
2023-01-16 22:03:09	26	M	Punjab	Master	Student	Good	Yes	No	No	No	No	No	No	No	Yes		No	No	No	No	Yes	Yes	No	No	Yes	No	Yes	Moderate
2023-01-16 22:09:37	32	M	Punjab	Secondary	Others	Poor	No	Yes	No	Yes	No	No	Yes	No	Yes	No	No	Yes	No	No	Yes	No	No	No	No	No	No	Moderate
2023-01-16 22:13:28	45	F	Punjab	Bachelor	Student		No	Yes	Yes	No	Yes	No	No	Yes	No	Yes	No	No	No	No	No	No	No	No	Yes	No	Yes
2023-01-16 22:16:42	40	F	Punjab	None	Others	Poor	Yes	Yes	No	Yes	Yes	Yes	No	No	Yes	No	No	Yes	No		Yes	No	No	No	Yes	No	Yes	High
2023-01-17 07:39:59	60	F	Punjab	Higher secondary	Others	Middle	Yes	No	Yes	Yes	Yes	No	Yes	No	No	No	No	No	No	No	Yes	No	No	No	No	No	No	High
2023-01-17 07:42:19	22	F	Punjab	Secondary	Others		Yes	No	No	No	No	Yes	No	No	No	No	No	No	No	No	Yes	No	No	No	No	No	No	Moderate
2023-01-17 07:50:59	46	M	Punjab	Bachelor	Teacher	Middle	Yes	No	No	Yes	Yes	No	Yes	No	No	No	No	No	No	Yes	Yes	No	No	No	No	No	No	Moderate
2023-01-17 08:11:45	58	F	Punjab	None	Others	Middle Class/ Stable	Yes	Yes	No	Yes	No	Yes	Yes	No	No	No	No	Yes	No	No	Yes	Yes	No	No	No	No	Yes	Moderate
2023-01-17 09:23:40	40	F	Punjab	None	Others	Lower Middle Class/ Stable	Yes	Yes	No	Yes	No	No	No	No	No	No	No	No	No	No	Yes	No	No	No	No	No	No	Moderate
2023-01-17 17:27:03	42	M	Punjab	Bachelor	Others	Middle	Yes	Yes	Yes	Yes	Yes	Yes	Yes	No	Yes	Yes	Medications	Yes	No	No	Yes	No	No	No	No	No	No	High
2023-01-17 17:28:34	27	M	Punjab	Bachelor	Student	Middle	Yes	No	Yes	No	No	No	Yes	No	Yes	Yes	Medications	Yes	No	No	Yes	No	No	No	No	No	No	High
2023-01-17 17:29:53	27	M	Punjab	Secondary	Others	Middle	No	No	Yes	Yes	No	No	Yes	No	No	No	Medications	No	No	No	Yes	No	No	No	No	No	No	Low
2023-01-17 17:31:11	43	F	Punjab	Bachelor	Others	Middle	No	Yes	No	Yes	No	No	Yes	No	No	Yes	Medications	No	No	No	Yes	No	No	No	No	No	No	Moderate
2023-01-17 17:32:25	32	F	Punjab	Secondary	Others	Poor	No	No	Yes	No	Yes	No	No	Yes	No	Yes	Medications	No	No	No	No	No	No	No	No	No	No	Moderate
2023-01-17 17:33:55	29	F	Punjab	None	Others	Poor	Yes	No	Yes	Yes	Yes	No	Yes	Yes	No	Yes	Medications	No	No	Yes	No	No	Yes	No	No	No	Yes	Moderate
2023-01-17 17:35:15	32	F	Punjab	Secondary	Others	Poor	No	No	Yes	No	Yes	No	No	Yes	No	Yes	Medications	No	No	No	No	No	No	No	No	No	No	Moderate
2023-01-17 17:35:51	35	F	Punjab	Secondary	Teacher	Moderate	No	Yes	No	Yes	Yes	No	Yes	Yes	No	No	Systemic illness	Yes	Yes	No	Yes	No	No	No	No	Yes	Yes	Moderate
2023-01-17 17:36:27	27	M	Punjab	Bachelor	Student	Moderate	No	Yes	No	Yes	No	Yes	Yes	Yes	Yes	Yes	Medications	No	No	No	Yes	No	No	No	No	No	No	High
2023-01-17 17:36:56	37	M	Punjab	Higher secondary	Teacher	High	No	Yes	Yes	Yes	No	Yes	Yes	Yes	Yes	Yes	Medications	No	No	No	Yes	No	No	No	No	No	No	High
2023-01-17 17:37:49	43	M	Punjab	Secondary	Others	Moderate	No	No	Yes	Yes	Yes	No	No	Yes	No	No	Medications	Yes	No	No	Yes	No	Yes	No	No	No	Yes	Moderate
2023-01-17 17:37:53	37	M	Punjab	Secondary	Doctor	high	No	Yes	No	Yes	No	Yes	No	Yes	No	No	Medications	Yes	No	Yes	No	Yes	No	No	No	Yes	Yes	High
2023-01-17 17:39:09	17	M	Punjab	Higher secondary	Student	Moderate	No	Yes	No	Yes	Yes	Yes	No	Yes	No	No	Medications	Yes	No	No	Yes	No	Yes	No	No	No	Yes	Moderate
2023-01-17 17:40:18	15	F	Punjab	Higher secondary	Student	Moderate	No	Yes	Yes	No	Yes	No	Yes	No	No	No	Medications	Yes	No	No	Yes	No	Yes	No	No	Yes	No	Moderate
2023-01-17 17:41:33	38	M	Punjab	None	Others	Poor	Yes	Yes	No	Yes	Yes	No	Yes	No	No	No	Medications	Yes	No	No	Yes	No	No	No	No	No	No	Moderate
2023-01-17 17:42:33	30	M	Punjab	None	Others	Good	Yes	Yes	No	No	Yes	No	No	No	No	No	Medications	No	No	No	Yes	No	No	No	No	No	Yes	Moderate
2023-01-17 17:44:02	25	M	Punjab	Master	Student	Good	Yes	No	No	Yes	Yes	Yes	No	No	No	No	Medications	No	No	No	Yes	No	No	No	No	No	No	Moderate
2023-01-17 17:45:12	65	F	Punjab	Primary	Others	Poor	Yes	Yes	No	Yes	Yes	No	Yes	No	No	No	Systemic illness	Yes	No	No	No	No	No	No	No	No	No	High
2023-01-17 17:46:54	35	M	Punjab	Secondary	Business man/woman	Good	Yes	No	No	Yes	No	No	No	No	No	No	Medications	No	No	No	Yes	No	No	No	No	Yes	No	Moderate
2023-01-17 17:47:48	46	M	Punjab	Secondary	Others	Poor	Yes	No	No	Yes	Yes	No	Yes	No	No	No	Medications	Yes	No	No	No	No	No	No	No	No	No	High
2023-01-17 17:48:55	60	F	Punjab	Bachelor	Others	Good	Yes	No	Yes	Yes	Yes	No	Yes	No	No	No	Systemic illness	Yes	No	No	No	No	No	No	No	No	No	High
2023-01-17 17:49:48	22	F	Punjab	Secondary	Others	Good	Yes	No	No	No	Yes	Yes	No	No	No	No	Medications	No	No	No	Yes	No	No	No	No	No	Yes	Moderate
2023-01-17 17:50:55	36	F	Punjab	Bachelor	Teacher	Moderate	Yes	No	Yes	Yes	Yes	No	Yes	No	Yes	No	Medications	Yes	No	No	Yes	No	No	No	No	No	Yes	High
2023-01-17 17:52:01	42	M	Punjab	None	Others	Poor	Yes	Yes	No	Yes	Yes	Yes	Yes	No	Yes	No	Medications	Yes	No	No	Yes	No	No	Yes	No	No	Yes	High
2023-01-17 17:53:22	36	M	Punjab	Bachelor	Business man/woman	Moderate	No	No	Yes	No	No	No	Yes	No	No	Yes	Medications	Yes	No	No	Yes	No	No	No	No	No	No	Moderate
2023-01-17 18:01:11	26	F	Punjab	Bachelor	Doctor	Good	No	No	Yes	Yes	Yes	Yes	Yes	Yes	Yes	No	Medications	No	No	No	Yes	Yes	No	Yes	No	Yes	No	Moderate
2023-01-17 23:51:27	16	F	Punjab	Higher secondary	Student	Good	Yes	No	No	No	Yes	No	No	No	Yes	No	No	No	No	No	Yes	No	No	No	No	No	No	Moderate
2023-01-17 23:53:41	55	F	Punjab	Higher secondary	Others	Good	No	No	No	No	No	No	No	No	No	No	No	No	No	No	Yes	No	No	No	No	No	No	Moderate
2023-01-17 23:56:40	37	F	Punajb	None	Others	Moderate	Yes	Yes	No	No	Yes	No	No	No	No	No	No	No	No	No	Yes	No	No	No	No	No		Moderate
2023-01-18 00:00:39	40	M	Punjab	None	Others	Poor	Yes	Yes	No	No	Yes	No	Yes	No	No	No	No	No	No	No	No	No	No	No	No	No		High
2023-01-18 05:56:21	25	M	Punjab	Higher secondary	Student	Moderate	Yes	Yes	No	No	Yes	Yes	Yes	No	No	No	No	No	No	No	Yes	No	No	No	No	No	No	Moderate
2023-01-18 06:00:27	41	F	Punjab	None	Others	Average	Yes	Yes	No	No	No	No	Yes	No	No	No	No	No	No	No	Yes	No	No	No	No	No	No	High
2023-01-18 06:04:06	55	F	Punjab	None	Others	Average	Yes	Yes	No	No		Yes	Yes	No	No	No	No	No	No	No	Yes	No	No	No	No	No	Yes	Moderate
2023-01-18 06:06:07	28	F	Punjab	Bachelor	Teacher	Good	Yes	No	No	No	Yes	Yes	No	Yes	No	No	No	No	No	No	Yes	No	No	No	No	No	No	Moderate
2023-01-18 06:08:19	38	F	Punjab	Primary	Others	Average	Yes	Yes	No	No	Yes	Yes	Yes	No	No	No	No	No	No	No	Yes	No	No	No	No	No	No	Moderate
2023-01-18 06:11:21	20	M	Punjab	Higher secondary	Student	Good	Yes	No	No	No	Yes	No	No	No	No	No	No	No	No	No	Yes	No	No	No	No	No	No	Moderate
2023-01-18 06:14:25	49	M	Punjab	None	Others	Average	Yes	Yes	No	No	No	Yes	Yes	No	No	No	No	No	No	No	No	No	No	No	No	No	Yes	Moderate
2023-01-18 12:49:07	50	F	Punjab	Primary	Others	Good	No	Yes	No	No	Yes	Yes	No	No	No	No	No	No	No	No	Yes	No	No	No	No	No	No	Moderate
2023-01-18 12:51:36	50	M	Punjab	None	Others	Poor	Yes	Yes	Yes	Yes	Yes	No	Yes	No	No	No	No	No	No	No	No	No	No	No	No	No	Yes	Low
2023-01-18 13:04:29	50	M	Punjab	None	Others	Poor	Yes	No	No	No	Yes	No	Yes	No	Yes	Yes	Systemic illness	No	No	No	No	No	No	No	No	Yes	No	High
2023-01-18 13:53:38	17	M	Punjab	None	Others	Good	Yes	Yes	No	Yes	Yes	No	Yes	No	No	No	Systemic illness	No	No	Yes	Yes	No	No	No	No	Yes	No	Moderate
2023-01-18 13:58:57	55	M	Punjab	None	Others	Poor	Yes	Yes	No	No	Yes	No	No	No	No	No	No	No	No	Yes	Yes	No	No	No	No	No	No	Moderate
2023-01-18 14:03:55	20	F	Punjab	Higher secondary	Student	Good	Yes	Yes	No	No	Yes	NO	No	No	No	No	No	No	No	Yes	Yes	No	No	No	No	No	No	Moderate
2023-01-18 14:18:41	15	F	Punjab	Secondary	Student	Good	Yes	Yes	No	No	Yes	No	No	No	No	No	No	No	No	Yes	Yes	No	No	No	No	No	No	Moderate
2023-01-18 14:25:27	24	F	Punjab	Bachelor	Student	Good	No	No	No	No	Yes	Yes	Yes	No	No	No	No	No	No	Yes	Yes	No		No	No	No	No	Moderate
2023-01-18 14:32:13	29	F	Punjab	Bachelor	Doctor	Good	Yes	No	No	No	No	No	No	No	No	No	No	No	Yes	Yes	Yes	No	No	No	No	No	No	Moderate
2023-01-18 14:39:09	37	M	Punjab	Bachelor	Teacher	Good	Yes	Yes	No	No	Yes	No	No	No	No	No	No	No	No	No	Yes	No	No	No	No	No	No	Moderate
2023-01-18 14:44:27	50	F	Punjab	None	Others	Average	Yes	No	No	No	Yes	No	No	No	No	No	No		No	Yes	Yes	No	No	No	No	No	No	Moderate
2023-01-18 14:50:04	20	F	Punjab	Bachelor	Student	Good	Yes	Yes	No	No	Yes	No	No	No	No	No	No	No	No	Yes	Yes		No	No	No	No	No	Moderate
2023-01-18 14:52:50	42	M	Punjab	Secondary	Others	Average	Yes	Yes	No	Yes	Yes	No	No	No	No	No	No	No	No	No	No	No	No	No	No	No	No	High
2023-01-18 14:55:14	25	F	Punjab	Master	Teacher	Good	Yes	Yes	No	No	Yes	No	No	No	No	No	No	No	No	Yes	Yes	No	No	No	No	No	No	High
2023-01-18 14:57:48	39	M	Punjab	None	Business man/woman	Good	No	Yes	No	No	Yes	No	No	No	No	No	No	No	No	Yes	Yes	No	No	No	No	No	No	Moderate
2023-01-18 15:01:34	20	F	Punjab	Bachelor	Student	Good	Yes	No	No	No	Yes	No	No	No	No	No	No	No	No	Yes	Yes	No	No	No	No	No	No	Moderate
2023-01-18 15:04:25	45	F	Punajb	Bachelor	Business man/woman	Good	No	Yes	No	No	No	No	Yes	No	No	No	No	No	No	No	No	No	No	No	No	No	No	High
2023-01-18 15:06:24	22	F	Punjab	Bachelor	Student	Good	Yes	Yes	No	No	Yes	No	No	No	No	No	No	No	No	Yes	Yes	No	No	No	No	No	Yes	Moderate
2023-01-18 15:09:06	40	M	Punjab	Secondary	Others	Average	Yes	Yes	No	No	Yes	No	Yes	No	No	No	No	No	No	No	Yes	No	No	No	No	No	Yes	Moderate
2023-01-18 15:11:33	60	M	Punjab	None	Others	Poor	Yes	Yes	No	Yes	Yes	No	Yes	No	Yes		Systemic illness	Yes	No	No	No	No	No	No	No	No		High
2023-01-18 15:29:20	22	M	Punjab	Bachelor	Student	Good	No	Yes	No	No	No	Yes	No	No	No	No	No	No	No	Yes	Yes	No	No	No	No	No	Yes	Low
2023-01-18 16:17:22	45	M	Punjab	None	Business man/woman	Good	Yes	Yes	No	Yes	Yes	No	No	No	No	No	No	No	No	No	Yes	No	No	No	No	No	No	High
2023-01-18 16:26:49	45	F	Punjab	Secondary	Others	Good	Yes	Yes	No	No	Yes	No	No	No	No	No	No	No	No	No	No	No	No	No	No	No	No	Moderate
2023-01-18 16:34:26	34	M	AJK	Ph.D	Teacher	Good	Yes	Yes	No	No	Yes	No	No	No	No	No	No	No	No	No	No	No	No	No	No	Yes	No	Moderate
2023-01-18 16:39:40	25	M	AJK	Master	Student	Good	Yes	Yes	No	No	Yes	No	No	No	No	No	No	No	No	No	Yes	No	Yes	Yes	Yes	Yes	No	Moderate
2023-01-18 16:41:57	20	F	AJK	Bachelor	Student	Good	Yes	Yes	No	No	Yes	No	No	No	No	No	No	No	No	Yes	Yes	No	No	No	No	No	No	Moderate
2023-01-18 17:01:46	45	M	AJK	Bachelor	Others	Good		Yes	No	No	Yes	No	No	No	No	No	No	No	No	No		No	No	No	No	No	No	High
2023-01-18 17:12:54	22	F	AJK	Bachelor	Student	Good	Yes	Yes	No	No	Yes	No	No	No	No	No	No	No	No	Yes	Yes	No	No	No	No	No	Yes	Moderate
2023-01-18 17:19:05	60	M	AJK	None	Others	Poor	Yes	Yes	No	Yes	Yes	No	No	No	No	No	No	No	No	No	No	No	No	No	No	No	Yes	High
2023-01-18 17:21:29	22	M	AJK	Bachelor	Student	Good	No	Yes	No	No	No	Yes	No	No	No	No	No	No	No	Yes	No	No	No	No	No	No	No	Low
2023-01-19 10:32:30	24	F	AJK	Master	Others	Middle Class/Not Stable	Yes	Yes	No	Yes	No	Yes	No	No	No		No	Yes	No	No	Yes	Yes	No	No	No	No	Yes	Moderate
2023-02-09 16:40:39	32	M	AJK	Primary	Doctor	Moderate	No	Yes	Yes	Yes	Yes	No	Yes	Yes	No	Yes	Medications	No	No	No	No	No	Yes	No	No	Yes	Yes	High
2023-02-09 16:41:46	17	M	AJK	Primary	Teacher	Moderate	No	Yes	No	Yes	Yes	No	No	Yes	Yes	Yes	Radiation to head and neck region	No	Yes	No	Yes	Yes	Yes	No	Yes	Yes	Yes	Low
2023-02-09 16:42:49	19	F	AJK	Primary	Doctor	Moderate	No	No	Yes	No	No	Yes	No	No	Yes	No	Medications	Yes	No	No	No	No	Yes	No	Yes	Yes	Yes	Low
2023-02-09 16:43:43	19	M	AJK	Primary	Teacher	Moderate	No	Yes	Yes	No	No	Yes	Yes	Yes	No	Yes	Systemic illness	Yes	Yes	No	No	Yes	Yes	Yes	Yes	Yes	Yes	Low
2023-02-09 16:44:32	18	F	AJK	Secondary	Student	Moderate	No	Yes	No	No	No	Yes	Yes	No	No	Yes	Radiation to head and neck region	Yes	No	No	No	No	Yes	Yes	No	Yes	Yes	Moderate
2023-02-09 16:47:41	22	F	AJK	Primary	Teacher	Moderate	No	Yes	No	Yes	Yes	Yes	No	Yes	Yes	Yes	Medications	No	Yes	No	No	No	No	Yes	No	Yes	No	High
2023-02-09 16:48:34	19	M	AJK	Secondary	Teacher	Moderate	Yes	Yes	No	No	No	Yes	No	Yes	Yes	No	Systemic illness	Yes	Yes	No	No	No	Yes	Yes	No	Yes	No	Moderate
2023-02-09 16:49:30	18	M	AJK	Secondary	Teacher	Moderate	No	Yes	Yes	No	No	Yes	Yes	No	Yes	No	Systemic illness	No	No	No	Yes	No	Yes	Yes	Yes	Yes	No	Moderate
2023-02-09 16:50:28	56	F	AJK	Primary	Teacher	Moderate	No	No	No	No	Yes	Yes	No	No	No	No	Radiation to head and neck region	No	No	Yes	No	No	Yes	No	Yes	No	No	Extremely high
2023-02-09 16:51:30	18	M	AJK	Primary	Lawyer	Moderate	No	Yes	Yes	Yes	No	No	No	No	No	No	Systemic illness	No	Yes	No	No	No	No	No	No	No	Yes	Low
2023-02-09 16:58:38	36	M	AJK	Primary	Teacher	Moderate	Yes	Yes	No	No	Yes	Yes	No	No	No	Yes	Radiation to head and neck region	No	Yes	No	No	No	Yes	Yes	Yes	No	No	Moderate
2023-02-09 17:04:29	32	F	AJK	Primary	Teacher	Moderate	No	Yes	No	No	No	No	Yes	Yes	Yes	No	Radiation to head and neck region	No	No	No	No	Yes	Yes	Yes	No	No	No	Moderate
2023-02-09 17:05:24	56	F	AJK	Secondary	Doctor	good	No	No	No	No	No	Yes	Yes	No	No	No	Radiation to head and neck region	No	No	No	No	No	No	No	Yes	Yes	No	High
2023-02-09 17:06:12	58	M	AJK	Secondary	Doctor	High	No	No	No	No	No	Yes	No	No	No	No	Radiation to head and neck region	Yes	No	No	No	No	No	No	Yes	No	No	Moderate
2023-01-17 17:28:34	27	M	AJK	Bachelor	Student	Middle	Yes	No	Yes	No	No	No	Yes		Yes	No	Medications	Yes	No	No	Yes	No	No	No	No	No	Yes	Moderate
2023-01-17 17:29:53	27	M	AJK	Secondary	Others	Middle	No	No	Yes	Yes	No	No	Yes	No	No	No	Medications	No	No	No	Yes	No	No	No	No	No	No	Low
2023-01-17 17:31:11	43	F	AJK	Bachelor	Others	Middle	No	Yes	No	Yes	No	No	Yes	No	No	Yes	Medications	No	No	No	Yes	No	No	No	No	No	No	Moderate
2023-01-17 17:32:25	32	F	AJK	Secondary	Others	Poor	No	No	Yes	No	Yes	No	No	Yes	No	Yes	Medications	No	No	No	No	No	No	No	No	No	No	Moderate
2023-01-17 17:33:55	29	F	AJK	None	Others	Poor	Yes	No	Yes	Yes	Yes	No	Yes	Yes	No	Yes	Medications	No	No	Yes	No	No	Yes	No	No	No	Yes	Moderate
2023-01-17 17:35:15	32	F	AJK	Secondary	Others	Poor	No	No	Yes	No	Yes	No	No	Yes	No	Yes	Medications	No	No	No	No	No	No	No	No	No	No	Moderate
2023-01-17 17:35:51	35	F	AJK	Secondary	Teacher	Moderate	No	Yes	No	Yes	Yes	No	Yes	Yes	No	No	Systemic illness	Yes	Yes	No	Yes	No	No	No	No	Yes	Yes	Moderate
2023-01-17 17:36:27	27	M	AJK	Bachelor	Student	Moderate	No	Yes	No	Yes	No	No	Yes	Yes	No	No	Medications	No	No	No	Yes	No	No	No	No	No	No	Moderate
2023-01-17 17:36:56	37	M	AJK	Higher secondary	Teacher	High	No	Yes	Yes	No	No	Yes	Yes	Yes	Yes	No	Medications	No	No	No	Yes	Yes	No	No	Yes	Yes	No	High
2023-01-17 17:28:34	27	M	AJK	Bachelor	Student	Middle	Yes	No	Yes	No	No	No	Yes		Yes	No	Medications	Yes	No	No	Yes	No	No	No	No	No	Yes	Moderate
2023-01-17 17:29:53	27	M	AJK	Secondary	Others	Middle	No	No	Yes	Yes	No	No	Yes	No	No	No	Medications	No	No	No	Yes	No	No	No	No	No	No	Low
2023-01-17 17:31:11	43	F	AJK	Bachelor	Others	Middle	No	Yes	No	Yes	No	No	Yes	No	No	Yes	Medications	No	No	No	Yes	No	No	No	No	No	No	Moderate
2023-01-17 17:32:25	32	F	AJK	Secondary	Others	Poor	No	No	Yes	No	Yes	No	No	Yes	No	Yes	Medications	No	No	No	No	No	No	No	No	No	No	Moderate
2023-01-17 17:33:55	29	F	AJK	None	Others	Poor	Yes	No	Yes	Yes	Yes	No	Yes	Yes	No	Yes	Medications	No	No	Yes	No	No	Yes	No	No	No	Yes	Moderate
2023-01-17 17:35:15	32	F	AJK	Secondary	Others	Poor	No	No	Yes	No	Yes	No	No	Yes	No	Yes	Medications	No	No	No	No	No	No	No	No	No	No	Moderate
2023-01-17 17:35:51	35	F	AJK	Secondary	Teacher	Moderate	No	Yes	No	Yes	Yes	No	Yes	Yes	No	No	Systemic illness	Yes	Yes	No	Yes	No	No	No	No	Yes	Yes	Moderate
2023-01-17 17:36:27	27	M	AJK	Bachelor	Student	Moderate	No	Yes	No	Yes	No	No	Yes	Yes	No	No	Medications	No	No	No	Yes	No	No	No	No	No	No	Moderate
2023-01-17 17:36:56	37	M	AJK	Higher secondary	Teacher	High	No	Yes	Yes	No	No	Yes	Yes	Yes	Yes	No	Medications	No	No	No	Yes	Yes	No	No	Yes	Yes	No	High
2023-01-17 17:28:34	27	M	AJK	Bachelor	Student	Middle	Yes	No	Yes	No	No	No	Yes		Yes	No	Medications	Yes	No	No	Yes	No	No	No	No	No	Yes	Moderate
2023-01-17 17:29:53	27	M	AJK	Secondary	Others	Middle	No	No	Yes	Yes	No	No	Yes	No	No	No	Medications	No	No	No	Yes	No	No	No	No	No	No	Low
2023-01-17 17:31:11	43	F	AJK	Bachelor	Others	Middle	No	Yes	No	Yes	No	No	Yes	No	No	Yes	Medications	No	No	No	Yes	No	No	No	No	No	No	Moderate
2023-01-17 17:32:25	32	F	AJK	Secondary	Others	Poor	No	No	Yes	No	Yes	No	No	Yes	No	Yes	Medications	No	No	No	No	No	No	No	No	No	No	Moderate
2023-01-17 17:33:55	29	F	AJK	None	Others	Poor	Yes	No	Yes	Yes	Yes	No	Yes	Yes	No	Yes	Medications	No	No	Yes	No	No	Yes	No	No	No	Yes	Moderate
2023-01-17 17:35:15	32	F	AJK	Secondary	Others	Poor	No	No	Yes	No	Yes	No	No	Yes	No	Yes	Medications	No	No	No	No	No	No	No	No	No	No	Moderate
2023-01-17 17:35:51	35	F	AJK	Secondary	Teacher	Moderate	No	Yes	No	Yes	Yes	No	Yes	Yes	No	No	Systemic illness	Yes	Yes	No	Yes	No	No	No	No	Yes	Yes	Moderate
2023-01-17 17:36:27	27	M	AJK	Bachelor	Student	Moderate	No	Yes	No	Yes	No	No	Yes	Yes	No	No	Medications	No	No	No	Yes	No	No	No	No	No	No	Moderate
2023-01-17 17:36:56	37	M	AJK	Higher secondary	Teacher	High	No	Yes	Yes	No	No	Yes	Yes	Yes	Yes	No	Medications	No	No	No	Yes	Yes	No	No	Yes	Yes	No	High
2023-01-17 17:28:34	27	M	AJK	Bachelor	Student	Middle	Yes	No	Yes	No	No	No	Yes		Yes	No	Medications	Yes	No	No	Yes	No	No	No	No	No	Yes	Moderate
2023-01-17 17:29:53	27	M	AJK	Secondary	Others	Middle	No	No	Yes	Yes	No	No	Yes	No	No	No	Medications	No	No	No	Yes	No	No	No	No	No	No	Low
2023-01-17 17:32:25	32	F	AJK	Secondary	Others	Poor	No	No	Yes	No	Yes	No	No	Yes	No	Yes	Medications	No	No	No	No	No	No	No	No	No	No	Moderate
2023-01-17 17:31:11	43	F	AJK	Bachelor	Others	Middle	No	Yes	No	Yes	No	No	Yes	No	No	Yes	Medications	No	No	No	Yes	No	No	No	No	No	No	Moderate
2023-01-17 17:33:55	29	F	AJK	None	Others	Poor	Yes	No	Yes	Yes	Yes	No	Yes	Yes	No	Yes	Medications	No	No	Yes	No	No	Yes	No	No	No	Yes	Moderate
2023-01-17 17:35:15	32	F	AJK	Secondary	Others	Poor	No	No	Yes	No	Yes	No	No	Yes	No	Yes	Medications	No	No	No	No	No	No	No	No	No	No	Moderate
2023-01-17 17:35:51	35	F	AJK	Secondary	Teacher	Moderate	No	Yes	No	Yes	Yes	No	Yes	Yes	No	No	Systemic illness	Yes	Yes	No	Yes	No	No	No	No	Yes	Yes	Moderate
2023-01-17 17:36:27	27	M	AJK	Bachelor	Student	Moderate	No	Yes	No	Yes	No	No	Yes	Yes	No	No	Medications	No	No	No	Yes	No	No	No	No	No	No	Moderate
2023-01-17 17:36:56	37	M	AJK	Higher secondary	Teacher	High	No	Yes	Yes	No	No	Yes	Yes	Yes	Yes	No	Medications	No	No	No	Yes	Yes	No	No	Yes	Yes	No	High
2023-01-17 17:32:25	32	F	AJK	Secondary	Others	Poor	No	No	Yes	No	Yes	No	No	Yes	No	Yes	Medications	No	No	No	No	No	No	No	No	No	No	Moderate
2023-01-17 17:31:11	43	F	AJK	Bachelor	Others	Middle	No	Yes	No	Yes	No	No	Yes	No	No	Yes	Medications	No	No	No	Yes	No	No	No	No	No	No	Moderate
2023-01-17 17:33:55	29	F	AJK	None	Others	Poor	Yes	No	Yes	Yes	Yes	No	Yes	Yes	No	Yes	Medications	No	No	Yes	No	No	Yes	No	No	No	Yes	Moderate
2023-02-14	59	M	AJK	Higher secondary	Teacher	Middle	Yes	Yes	No	Yes		Yes	No	No	No	No	No	No	No	No	No	No	No	No	No	No	No	High
2023-02-14	30	M	AJK	Primary	Others	low	Yes	Yes	Yes	No	Yes	No	Yes	No	No	No	No	No	No	No	No	No	No	No	No	No	No	High
2023-02-14	54	M	AJK	None	Others	low	Yes	Yes	No	Yes	Yes	No	Yes	No	No	No	No	No	No	No	No	No	No	No	No	No	No	High
2023-02-14	17	F	AJK	Higher secondary	Student	Middle	No	Yes	No	No	No	No	No	No	No	No	No	No	No	Yes	Yes	No	Yes	No	No	No	Yes	Low
2023-02-15	24	M	AJK	Master	Student	middle	No	No	No	No	Yes	Yes	No	No	No	No	No	No	No	Yes	Yes	No	No	No		No	No	Moderate
2023-02-15	28	F	KPK	Secondary	Others	Middle	Yes	Yes	No	Yes	No	Yes	Yes	No	No	No	No	No	No	No	Yes	No	No	No	No	No	No	Moderate
2023-02-15	40	M	KPK	None	Others	Poor	Yes	Yes	No	Yes	Yes	No	Yes	No	No		No	No	No	No	No	No	No	No	No	No	No	High
2023-02-15	20	F	KPK	Secondary	Student	Middle	Yes	No	No	Yes	No	Yes	Yes	No	No	No	No	No	No	Yes	Yes	No	No	No	No	No	No	Moderate
2023-02-15	25	M	KPK	Bachelor	Teacher	Middle	Yes	No	No	Yes	No	Yes	Yes	No	No	No	No	No	No	Yes	Yes	No	No	No	No	No	No	Moderate
2023-02-15	40	M	KPK	Higher secondary	Business man/woman	Middle	Yes	Yes	No	Yes	Yes	No	Yes	No	No	No	No	No	No	No	No	No	No	No	No	No	No	High
2023-02-15	35	F	KPK	None	Others	middle	Yes	No	No	No	Yes	Yes	No	No	No	No	No	No	No	Yes	Yes	No	No	No	No	No	No	Moderate
2023-02-15	25	M	KPK	Master	Student	Middle	Yes	Yes	No	No	No	Yes	Yes	No	No	No	No	No	No	Yes	Yes	No	No	No	No	No	No	Moderate
2023-02-15	55	F	KPK	Higher secondary	Others	middle	Yes	Yes	No	Yes	No	Yes	No	No	No	No	No	No	No	Yes	Yes	No	No	No		No	No	Moderate
2023-02-16	23	F	KPK	Bachelor	Student	Middle Class/ Stable	Yes	Yes	No	Yes	No	Yes	Yes	No	No	No	No	No	No	No	Yes	Yes	No	No	No	No	Yes	Moderate
2023-02-16	25	M	KPK	None	Others	Low	Yes	No	No	Yes	No	No	Yes	No	No	No	No	No	No	No	Yes	No	No	No	No	No	No	Moderate
2023-02-16	45	F	KPK	Secondary	Others	Poor	No	Yes	No	Yes	No	No	Yes	No	No	No	No	No	No	No	Yes	No	No	No	Yes	No	No	Moderate
2023-02-16	32	M	KPK	Primary	Others	Low	Yes	No	No	Yes	No	No	Yes	No	No	No	No	No	No	No	Yes	No	No	No	No	No	Yes	Moderate
2023-02-16	32	F	KPK	Secondary	Others	Low	No	Yes	No	Yes	No	No	Yes	No	No	No	No	No	No	No	Yes	No	No	No	No	No	No	Moderate
2023-02-16	45	F	KPK	Secondary	Others	Poor	Yes	Yes	No	Yes	No	No	Yes	No	No	No	No	No	No	No	Yes	No	No	No	No	No	No	Moderate
2023-02-16	15	F	KPK	Secondary	Others	Low	No	Yes	No	Yes	Yes	No	Yes	No	No	No	No	No	No	No	Yes	Yes	No	No	No	No	No	Moderate
2023-02-16	14.4	F	KPK	Secondary	Student	Middle	Yes	No	No	No	No	Yes	Yes	No	No	No	No	No	No	Yes	Yes	No	No	No	No	No	No	Moderate
2023-02-16	29	F	KPK	Master	Others	Middlee	Yes	Yes	No	No	No	Yes	Yes	No	No	No	No	No	No	Yes	Yes	No	No	No	No	No	No	Moderate
2023-02-16	23.2	F	KPK	Master	Student	Middle	No	No	No	No	No	Yes	No	No	No	No	No	No	Yes	Yes	Yes	Yes	Yes	No	Yes	No	Yes	Low
2023-02-16	20	F	KPK	Bachelor	Student	High	Yes	No	No	No	No	No	Yes	No	No	No	No	No	Yes	Yes	Yes	Yes	No	No	No	No	No	Moderate
2023-02-16	23.2	F	KPK	Higher secondary	Student	Middle	Yes	Yes		Yes	Yes	No	No	No	No	No	No	No	Yes	Yes	Yes	No	No	No	No	No	No	Moderate
2023-02-16	40	F	KPK	Others	Others	Middle	Yes	Yes	No	Yes	Yes	Yes	No	No	No	No	No	No	No	No	Yes	No	No	No	No	No	No	High
2023-02-16	55	F	KPK	Primary	Others	Middle	Yes	Yes	No	Yes	Yes	Yes	No	No	No	No	No	No	No	No	Yes	No	No	No	No	No	No	High
2023-02-16	31	F	KPK	Master	Teacher	Middle	Yes	Yes	No	No	Yes	No	No	No	No	No	No	No	No	Yes	Yes	No	No	No	No	No	No	Moderate
2023-02-16	14	M	KPK	Secondary	Student	Middle	No	No	Yes	No	Yes	No	Yes	No	No	No	No	No	No	Yes	Yes	No	No	No	No	No	No	Moderate
2023-02-16	40	F	KPK	Master	Student	Middle	Yes	Yes	No	No	Yes	No	No	No	No	No	No	No	No	Yes	Yes	No	No	No	No	No	No	Moderate
2023-02-16	21	F	KPK	Bachelor	Student	Middle	Yes	Yes	No	No	No	Yes	Yes	No	No	No	No	No	No	Yes	Yes	No	No	No	No	No	No	Moderate
2023-02-16	25	M	KPK	Master	Lecture	High	No	No	No	No	No	No	No	No	No	No	No	No	No	Yes	Yes	Yes	Yes	No	No	No	No	Low
2023-02-16	47	M	KPK	Secondary	Others	Poor	Yes	Yes	No	Yes	Yes	Yes	No	No	No	No	No	No	No	No	Yes	No	No	No	No	No	No	High
2023-02-16	30	F	KPK	Bachelor	Others	Average	Yes	Yes	No	Yes	Yes	Yes	No	Yes	No	No	Systemic illness	No	No	Yes	Yes	No	No	No	Yes	No	No	Moderate
2023-02-16	37	F	KPK	Master	Others	Average	Yes	Yes	No	Yes	Yes	Yes	No	No	No	No	Systemic illness	Yes	No	Yes	Yes	Yes	No	No	No	No	No	Moderate
2023-02-16	25	F	KPK	Bachelor	Student	Average	Yes	Yes	No	Yes	No	No	No	No	No	No	Medications	No	No	Yes	Yes	No	No	No	No	No	No	Moderate
2023-02-16	26	M	KPK	Secondary	Others	Shopkeeper	Yes	Yes	No	No	Yes	No	No	No	No	No	Systemic illness	No	No	Yes	Yes	No	No	No	No	No	No	Moderate
2023-02-16	15	F	KPK	Secondary	Student	Student	Yes	Yes	No	No	No	Yes	No	No	No	No	Medications	No	No	Yes	Yes	Yes	No	No	No	No	No	Moderate
2023-02-16	28	F	KPK	Master	Others	Middle	Yes	Yes	No	Yes	No	No	No	No	No	No	Medications	No	No	Yes	Yes	Yes	No	No	No	No	No	Moderate
2023-02-16	38	F	KPK	Secondary	Others	Middle	Yes	Yes	No	Yes	Yes	No	No	No	No	No	Systemic illness	Yes	No	Yes	Yes	No	No	No	No	No	No	Moderate
2023-02-16	36	M	KPK	Bachelor	Business man/woman	Middle	Yes	Yes	No	Yes	Yes	No	No	No	No	No	Medications	Yes	No	Yes	Yes	No	No	No	No	No	No	High
2023-02-16	19	F	KPK	Bachelor	Student	Middle	Yes	Yes	No	No	No	No	No	No	No	No	Systemic illness	No	No	Yes	Yes	No	No	No	No	No	No	Moderate
2023-02-16	20	F	KPK	Bachelor	Student	Middle	Yes	Yes	No	Yes	No	Yes	No	No	No	No	Medications	No	No	Yes	Yes	Yes	No	No	Yes	No	No	Moderate
2023-02-16	37	F	KPK	Secondary	Student	Moderate	Yes	No	Yes	Yes	Yes	Yes	No	Yes	No	Yes	Systemic illness	Yes	Yes	Yes	Yes	No	No	Yes	No	Yes	Yes	Low
2023-02-16	22	M	KPK	Primary	Doctor	High	Yes	No	Yes	Yes	No	Yes	No	No	Yes	No	Medications	No	Yes		Yes	No	Yes	No	Yes	Yes	No	High
2023-02-16	26	F	KPK	Higher secondary	Engineer	Moderate	No	No	Yes	No	No	Yes	No	No	Yes	Yes	Medications	No	Yes	No	Yes	No	No	No	No	Yes	Yes	Low
2023-02-16	35	F	KPK	Primary	Student	high	No	Yes	No	Yes	No	Yes	Yes	No	No	Yes	Systemic illness	Yes	No			Yes	No	No	No	Yes	Yes	Low
2023-02-16	35	F	KPK	None	Others	Moderate	No	Yes	Yes	No	No	Yes	No	Yes	Yes		Systemic illness		No	No		Yes	No			Yes		Low
2023-02-16	37	M	KPK	Primary	Teacher	High	Yes	No	No	Yes	No	No		Yes	No		Systemic illness	No		No		No		Yes	Yes			Low
2023-02-16	72	F	KPK	None	Teacher	High	No	No	No	No	No		No	Yes	No	Yes	Systemic illness	No		No	No		Yes				No	Low
2023-02-16	36	M	KPK	Primary	Lawyer	High	Yes	Yes	No	No	Yes	No	No	No	No	Yes	Medications	Yes	No	Yes	Yes	No	No	No	No		Yes	Low
2023-02-16	37	F	KPK	Secondary	Student	Low	No	No	Yes	Yes					Yes	Yes	Systemic illness		No		Yes	Yes	Yes			Yes	No
2023-02-16	45	F	KPK	Primary	Teacher	high	No	No	No	No	No	No	No	No	No	Yes	Systemic illness			No		Yes	No		Yes	Yes
2023-02-18	23	F	SINDH	Secondary	Student	Good	Yes	Yes	Yes	No	Yes	Yes	Yes		Yes	Yes	Systemic illness	No	No	No	Yes	No	No	No	No	No	No	High
2023-02-18	25	F	SINDH	Master	Teacher	Good	Yes	No	No	No	Yes	Yes, No	No		No	No	No	No	Yes	No	Yes	Yes	No	No	No	No	No	Moderate
2023-02-18	23	F	SINDH	Master	Student	Good	Yes	Yes	No	No	Yes	Yes	No	No	No	No	No	No	Yes	No		Yes	No	No	No	No	No	Moderate
2023-02-18	30	F	SINDH	Bachelor	Others	Good	Yes	Yes	No	No	Yes	Yes	Yes	No	No	No	No	No	No	Yes	Yes	No	No	No	No	No	No	Moderate
2023-02-18	11	F	SINDH	Primary	Student	Good	No	Yes	No	No	No	Yes	Yes	No	No	No	No	No	No	No	Yes	No	No	No	No	No	No	Low
2023-02-18	52	M	SINDH	Others	Others	Poor	Yes	Yes	Yes			Yes	Yes	Yes	Yes		No				Yes							Moderate
2023-02-18	32	M	SINDH	Bachelor	Others	Middle	Yes	Yes	Yes			Yes		Yes			No				Yes					Yes	Yes	Moderate
2023-02-18	23	F	SINDH	Bachelor	Student	Middle	Yes	Yes	Yes				Yes				No				Yes			No				Low
2023-02-18	16	F	SINDH	Bachelor	Student	Good	No	No	No	Yes	No	Yes	No	No	Yes	No	No	Yes		No	Yes	No			No	No	No	Moderate
2023-02-18	42	M	SINDH	Ph.D	Student	Good	No	Yes	No	Yes	No	Yes	No	No	No	Yes	No	No	No		Yes	No	No	No	Yes	No	No	Moderate
2023-02-18	22	M	SINDH	Bachelor	Student	Poor	No	Yes	No	Yes	No	No	Yes	No	Yes	No	No	Yes	No		Yes	No	No	No	No	No	No	Moderate
2023-02-18	26	M	SINDH	Master	Student	Good	Yes	No	No	No	No	No	No	No	Yes		No	No	No	No	Yes	Yes	No	No	Yes	No	Yes	Moderate
2023-02-18	32	M	SINDH	Secondary	Mecanic	Poor	No	Yes	No	Yes	No	No	Yes	No	Yes	No	No	Yes	No	No	Yes	No	No	No	No	No	No	Moderate
2023-02-18	45	F	SINDH	Bachelor	Teacher	Middle	No	Yes	Yes	No	Yes	No	No	Yes	No	Yes	No	No	No	No	No	No	No	No	Yes	No	Yes
2023-02-18	40	F	SINDH	None	Others	Poor	Yes	Yes	No	Yes	Yes	Yes	No	No	Yes	No	No	Yes	No		Yes	No	No	No	Yes	No	Yes	High
2023-02-18	60	F	SINDH	Higher secondary	Others	Middle	Yes	No	Yes	Yes	Yes	No	Yes	No	No	No	No	No	No	No	Yes	No	No	No	No	No	No	High
2023-02-18	22	F	SINDH	Secondary	Student	Midle	Yes	No	No	No	No	Yes	No	No	No	No	No	No	No	No	Yes	No	No	No	No	No	No	Moderate
2023-02-18	46	M	SINDH	Bachelor	Teacher	Middle	Yes	No	No	Yes	Yes	No	Yes	No	No	No	No	No	No	Yes	Yes	No	No	No	No	No	No	Moderate
2023-02-18	58	F	SINDH	None	Others	Poor	Yes	Yes	No	Yes	No	Yes	Yes	No	No	No	No	Yes	No	No	Yes	Yes	No	No	No	No	Yes	Moderate
2023-02-18	40	F	SINDH	None	Others	Poor	Yes	Yes	No	Yes	No	No	No		No	No	No	No	No	No	Yes	No	No	No	No	No	No	Moderate
2023-02-18	42	M	SINDH	Secondry	Others	Middle	Yes	Yes	Yes				Yes				No	Yes			Yes							Moderate
2023-02-18	27	M	SINDH	Bachelor	Student	Middle	Yes	No	Yes	No	No	No	Yes		Yes	No	Medications	Yes	No	No	Yes	No	No	No	No	No	Yes	Moderate
2023-02-18	27	M	SINDH	Secondary	Others	Middle	No	No	Yes	Yes	No	No	Yes	No	No	No	Medications	No	No	No	Yes	No	No	No	No	No	No	Low
2023-02-18	43	F	SINDH	Bachelor	Others	Middle	No	Yes	No	Yes	No	No	Yes	No	No	Yes	Medications	No	No	No	Yes	No	No	No	No	No	No	Moderate
2023-02-18	32	F	SINDH	Secondary	Others	Poor	No	No	Yes	No	Yes	No	No	Yes	No	Yes	Medications	No	No	No	No	No	No	No	No	No	No	Moderate
2023-02-18	29	F	SINDH	None	Others	Poor	Yes	No	Yes	Yes	Yes	No	Yes	Yes	No	Yes	Medications	No	No	Yes	No	No	Yes	No	No	No	Yes	Moderate
2023-02-18	32	F	SINDH	Secondary	Others	Poor	No	No	Yes	No	Yes	No	No	Yes	No	Yes	Medications	No	No	No	No	No	No	No	No	No	No	Moderate
2023-02-18	35	F	SINDH	Secondary	Teacher	Moderate	No	Yes	No	Yes	Yes	No	Yes	Yes	No	No	Systemic illness	Yes	Yes	No	Yes	No	No	No	No	Yes	Yes	Moderate
2023-02-18	27	M	SINDH	Bachelor	Student	Moderate	No	Yes	No	Yes	No	No	Yes	Yes	No	No	Medications	No	No	No	Yes	No	No	No	No	No	No	Moderate
2023-02-18	37	M	SINDH	Higher secondary	Teacher	High	No	Yes	Yes	No	No	Yes	Yes	Yes	Yes	No	Medications	No	No	No	Yes	Yes	No	No	Yes	Yes	No	High
2023-02-19	43	M	SINDH	Secondary	Others	Moderate	No	No	Yes	Yes	Yes	No	No	Yes	No	No	Medications	Yes	No	No	Yes	No	Yes	No	No	No	Yes	Moderate
2023-02-19	37	M	SINDH	Secondary	Doctor	high	No	Yes	No	Yes	No	Yes	No	Yes	No	No	Medications	Yes	No	Yes	No	Yes	No	No	No	Yes	Yes	High
2023-02-19	17	M	SINDH	Higher secondary	Student	Moderate	No	Yes	No	Yes	Yes	Yes	No	Yes	No	No	Medications	Yes	No	No	Yes	No	Yes	No	No	No	Yes	Moderate
2023-02-19	15	F	SINDH	Higher secondary	Student	Moderate	No	Yes	Yes	No	Yes	No	Yes	No	No	No	Medications	Yes	No	No	Yes	No	Yes	No	No	Yes	No	Moderate
2023-02-19	38	M	SINDH	None	Others	Poor	Yes	Yes	No	Yes	Yes	No	Yes	No	No	No	Medications	Yes	No	No	Yes	No	No	No	No	No	No	Moderate
2023-02-19	30	M	SINDH	None	Others	Good	Yes	Yes	No	No	Yes	No	No	No	No	No	Medications	No	No	No	Yes	No	No	No	No	No	Yes	Moderate
2023-02-19	25	M	SINDH	Master	Student	Good	Yes	No	No	Yes	Yes	Yes	No	No	No	No	Medications	No	No	No	Yes	No	No	No	No	No	No	Moderate
2023-02-19	65	F	SINDH	Primary	Others	Poor	Yes	Yes	No	Yes	Yes	No	Yes	No	No	No	Systemic illness	Yes	No	No	No	No	No	No	No	No	No	High
2023-02-19	35	M	SINDH	Secondary	Business man/woman	Good	Yes	No	No	Yes	No	No	No	No	No	No	Medications	No	No	No	Yes	No	No	No	No	Yes	No	Moderate
2023-02-19	46	M	SINDH	Secondary	Others	Poor	Yes	No	No	Yes	Yes	No	Yes	No	No	No	Medications	Yes	No	No	No	No	No	No	No	No	No	High
2023-02-19	60	F	SINDH	Bachelor	Others	Good	Yes	No	Yes	Yes	Yes	No	Yes	No	No	No	Systemic illness	Yes	No	No	No	No	No	No	No	No	No	High
2023-02-19	22	F	SINDH	Secondary	Others	Good	Yes	No	No	No	Yes	Yes	No	No	No	No	Medications	No	No	No	Yes	No	No	No	No	No	Yes	Moderate
2023-02-19	36	F	SINDH	Bachelor	Teacher	Moderate	Yes	No	Yes	Yes	Yes	No	Yes	No	Yes	No	Medications	Yes	No	No	Yes	No	No	No	No	No	Yes	High
2023-02-19	42	M	ICT	None	Others	Poor	Yes	Yes	No	Yes	Yes	Yes	Yes	No	Yes	No	Medications	Yes	No	No	Yes	No	No	Yes	No	No	Yes	High
2023-02-19	36	M	ICT	Bachelor	Business man/woman	Moderate	No	No	Yes	No	No	No	Yes	No	No	Yes	Medications	Yes	No	No	Yes	No	No	No	No	No	No	Moderate
2023-02-19	26	F	ICT	Bachelor	Doctor	Good	No	No	Yes	Yes	Yes	Yes	Yes	Yes	Yes	No	Medications	No	No	No	Yes	Yes	No	Yes	No	Yes	No	Moderate
2023-02-19	16	F	ICT	Higher secondary	Student	Good	Yes	No	No	No	Yes	No	No	No	Yes	No	No	No	No	No	Yes	No	No	No	No	No	No	Moderate
2023-02-19	55	F	ICT	Higher secondary	Others	Good	No	No	No	No	No	No	No	No	No	No	No	No	No	No	Yes	No	No	No	No	No	No	Moderate
2023-02-19	37	F	ICT	None	Others	Moderate	Yes	Yes	No	No	Yes	No	No	No	No	No	No	No	No	No	Yes	No	No	No	No	No		Moderate
2023-02-19	40	M	ICT	None	Others	Poor	Yes	Yes	No	No	Yes	No	Yes	No	No	No	No	No	No	No	No	No	No	No	No	No		High
2023-02-19	25	M	KPK	Higher secondary	Student	Moderate	Yes	Yes	No	No	Yes	Yes	Yes	No	No	No	No	No	No	No	Yes	No	No	No	No	No	No	Moderate
2023-02-19	41	F	ICT	None	Others	Average	Yes	Yes	No	No	No	No	Yes	No	No	No	No	No	No	No	Yes	No	No	No	No	No	No	High
2023-02-19	55	F	KPK	None	Others	Average	Yes	Yes	No	No		Yes	Yes	No	No	No	No	No	No	No	Yes	No	No	No	No	No	Yes	Moderate
2023-02-19	28	F	ICT	Bachelor	Teacher	Good	Yes	No	No	No	Yes	Yes	No	Yes	No	No	No	No	No	No	Yes	No	No	No	No	No	No	Moderate
2023-02-20	38	F	ICT	Primary	Others	Average	Yes	Yes	No	No	Yes	Yes	Yes	No	No	No	No	No	No	No	Yes	No	No	No	No	No	No	Moderate
2023-02-20	20	M	ICT	Higher secondary	Student	Good	Yes	No	No	No	Yes	No	No	No	No	No	No	No	No	No	Yes	No	No	No	No	No	No	Moderate
2023-02-20	49	M	ICT	None	Others	Average	Yes	Yes	No	No	No	Yes	Yes	No	No	No	No	No	No	No	No	No	No	No	No	No	Yes	Moderate
2023-02-20	50	F	ICT	Primary	Others	Good	No	Yes	No	No	Yes	Yes	No	No	No	No	No	No	No	No	Yes	No	No	No	No	No	No	Moderate
2023-02-20	50	M	KPK	None	Others	Poor	Yes	Yes	Yes	Yes	Yes	No	Yes	No	No	No	No	No	No	No	No	No	No	No	No	No	Yes	Low
2023-02-20	50	M	ICT	None	Others	Poor	Yes	No	No	No	Yes	No	Yes	No	Yes	Yes	Systemic illness	No	No	No	No	No	No	No	No	Yes	No	High
2023-02-20	17	M	KPK	None	Others	Good	Yes	Yes	No	Yes	Yes	No	Yes	No	No	No	Systemic illness	No	No	Yes	Yes	No	No	No	No	Yes	No	Moderate
2023-02-20	55	M	ICT	None	Others	Poor	Yes	Yes	No	No	Yes	No	No	No	No	No	No	No	No	Yes	Yes	No	No	No	No	No	No	Moderate
2023-02-20	20	F	ICT	Higher secondary	Student	Good	Yes	Yes	No	No	Yes	NO	No	No	No	No	No	No	No	Yes	Yes	No	No	No	No	No	No	Moderate
2023-02-20	15	F	ICT	Secondary	Student	Good	Yes	Yes	No	No	Yes	No	No	No	No	No	No	No	No	Yes	Yes	No	No	No	No	No	No	Moderate
2023-02-20	24	F	ICT	Bachelor	Student	Good	No	No	No	No	Yes	Yes	Yes	No	No	No	No	No	No	Yes	Yes	No		No	No	No	No	Moderate
2023-02-20	29	F	ICT	Bachelor	Doctor	Good	Yes	No	No	No	No	No	No	No	No	No	No	No	Yes	Yes	Yes	No	No	No	No	No	No	Moderate
2023-02-20	37	M	ICT	Bachelor	Teacher	Good	Yes	Yes	No	No	Yes	No	No	No	No	No	No	No	No	No	Yes	No	No	No	No	No	No	Moderate
2023-02-20	50	F	ICT	None	Others	Average	Yes	No	No	No	Yes	No	No	No	No	No	No		No	Yes	Yes	No	No	No	No	No	No	Moderate
2023-02-20	20	F	ICT	Bachelor	Student	Good	Yes	Yes	No	No	Yes	No	No	No	No	No	No	No	No	Yes	Yes	No	No	No	No	No	No	Moderate
2023-02-20	42	M	ICT	Secondary	Others	Average	Yes	Yes	No	Yes	Yes	No	No	No	No	No	No	No	No	No	No	No	No	No	No	No	No	High
2023-02-20	25	F	ICT	Master	Teacher	Good	Yes	Yes	No	No	Yes	No	No	No	No	No	No	No	No	Yes	Yes	No	No	No	No	No	No	High
2023-02-20	39	M	ICT	None	Business man/woman	Good	No	Yes	No	No	Yes	No	No	No	No	No	No	No	No	Yes	Yes	No	No	No	No	No	No	Moderate
2023-02-20	20	F	ICT	Bachelor	Student	Good	Yes	No	No	No	Yes	No	No	No	No	No	No	No	No	Yes	Yes	No	No	No	No	No	No	Moderate
2023-02-20	45	F	ICT	Bachelor	Business man/woman	Good	No	Yes	No	No	No	No	Yes	No	No	No	No	No	No	No	No	No	No	No	No	No	No	High
2023-02-20	22	F	KPK	Bachelor	Student	Good	Yes	Yes	No	No	Yes	No	No	No	No	No	No	No	No	Yes	Yes	No	No	No	No	No	Yes	Moderate
2023-02-20	40	M	KPK	Secondary	Others	Average	Yes	Yes	No	No	Yes	No	Yes	No	No	No	No	No	No	No	Yes	No	No	No	No	No	Yes	Moderate
2023-02-20	60	M	KPK	None	Others	Poor	Yes	Yes	No	Yes	Yes	No	Yes	No	Yes		Systemic illness	Yes	No	No	No	No	No	No	No	No	No	High
2023-02-20	22	M	PUNJAB	Bachelor	Student	Good	No	Yes	No	No	No	Yes	No	No	No	No	No	No	No	Yes	Yes	No	No	No	No	No	Yes	Low
2023-02-20	45	M	PUNJAB	None	Business man/woman	Good	Yes	Yes	No	Yes	Yes	No	No	No	No	No	No	No	No	No	Yes	No	No	No	No	No	No	High
2023-02-20	45	F	ICT	Secondary	Others	Good	Yes	Yes	No	No	Yes	No	No	No	No	No	No	No	No	No	No	No	No	No	No	No	No	Moderate
2023-02-20	34	M	ICT	Ph.D	Teacher	Good	Yes	Yes	No	No	Yes	No	No	No	No	No	No	No	No	No	No	No	No	No	No	Yes	No	Moderate
2023-02-20	25	M	ICT	Master	Student	Good	Yes	Yes	No	No	Yes	No	No	No	No	No	No	No	No	No	Yes	No	Yes	Yes	Yes	Yes	No	Moderate
2023-02-20	20	F	GB	Bachelor	Student	Good	Yes	Yes	No	No	Yes	No	No	No	No	No	No	No	No	Yes	Yes	No	No	No	No	No	No	Moderate
2023-02-20	45	M	GB	Bachelor	Others	Good		Yes	No	No	Yes	No	No	No	No	No	No	No	No	No	Yes	No	No	No	No	No	No	High
2023-02-20	22	F	GB	Bachelor	Student	Good	Yes	Yes	No	No	Yes	No	No	No	No	No	No	No	No	Yes	Yes	Yes	No	No	No	No	No	Moderate
2023-02-21	60	M	GB	None	Others	Poor	Yes	Yes	No	Yes	Yes	No	No	No	No	No	No	No	No	No	Yes	No	No	No	No	No	No	High
2023-02-21	22	M	GB	Bachelor	Student	Good	No	Yes	No	No	No	Yes	No	No	No	No	No	No	No	Yes	No	No	No	No	No	No	No	Low
2023-02-21	24	F	GB	Master	Others	Middle Class/Not Stable	Yes	Yes	No	Yes	No	Yes	No	No	No		No	Yes	No	No	Yes	Yes	No	No	No	No	Yes	Moderate
2023-02-21	32	M	GB	Primary	Doctor	Moderate	No	Yes	Yes	Yes	Yes	No	Yes	Yes	No	Yes	Medications	No	No	No	No	No	Yes	No	No	Yes	Yes	High
2023-02-21	17	M	ICT	Primary	Teacher	Moderate	No	Yes	No	Yes	Yes	No	No	Yes	Yes	Yes	Radiation to head and neck region	No	Yes	No	Yes	Yes	Yes	No	Yes	Yes	Yes	Low
2023-02-21	19	F	ICT	Primary	Doctor	Moderate	No	No	Yes	No	No	Yes	No	No	Yes	No	Medications	Yes	No	No	No	No	Yes	No	Yes	Yes	Yes	Low
2023-02-21	19	M	ICT	Primary	Teacher	Moderate	No	Yes	Yes	No	No	Yes	Yes	Yes	No	Yes	Systemic illness	Yes	Yes	No	No	Yes	Yes	Yes	Yes	Yes	Yes	Low
2023-02-21	18	F	ICT	Secondary	Student	Moderate	No	Yes	No	No	No	Yes	Yes	No	No	Yes	Radiation to head and neck region	Yes	No	No	No	No	Yes	Yes	No	Yes	Yes	Moderate
2023-02-21	22	F	ICT	Primary	Teacher	Moderate	No	Yes	No	Yes	Yes	Yes	No	Yes	Yes	Yes	Medications	No	Yes	No	No	No	No	Yes	No	Yes	No	High
2023-02-21	19	M	ICT	Secondary	Teacher	Moderate	Yes	Yes	No	No	No	Yes	No	Yes	Yes	No	Systemic illness	Yes	Yes	No	No	No	Yes	Yes	No	Yes	No	Moderate
2023-02-21	18	M	ICT	Secondary	Teacher	Moderate	No	Yes	Yes	No	No	Yes	Yes	No	Yes	No	Systemic illness	No	No	No	Yes	No	Yes	Yes	Yes	Yes	No	Moderate
2023-02-21	56	F	ICT	Primary	Teacher	Moderate	No	No	No	No	Yes	Yes	No	No	No	No	Radiation to head and neck region	No	No	Yes	No	No	Yes	No	Yes	No	No	Extremely high
2023-02-21	18	M	ICT	Primary	Lawyer	Moderate	No	Yes	Yes	Yes	No	No	No	No	No	No	Systemic illness	No	Yes	No	No	No	No	No	No	No	Yes	Low
2023-02-21	36	M	ICT	Primary	Teacher	Moderate	Yes	Yes	No	No	Yes	Yes	No	No	No	Yes	Radiation to head and neck region	No	Yes	No	No	No	Yes	Yes	Yes	No	No	Moderate
2023-02-21	32	F	ICT	Primary	Teacher	Moderate	No	Yes	No	No	No	No	Yes	Yes	Yes	No	Radiation to head and neck region	No	No	No	No	Yes	Yes	Yes	No	No	No	Moderate
2023-02-21	56	F	ICT	Secondary	Doctor	good	No	No	No	No	No	Yes	Yes	No	No	No	Radiation to head and neck region	No	No	No	No	No	No	No	Yes	Yes	No	High
2023-02-21	58	M	ICT	Secondary	Doctor	High	No	No	No	No	No	Yes	No	No	No	No	Radiation to head and neck region	Yes	No	No	No	No	No	No	Yes	No	No	Moderate
2023-02-21	47	M	ICT	Secondary	Others	Poor	Yes	Yes	No	No	Yes	Yes	No	No	No	No	No	No	No	No	Yes	No	No	No	No	No	No	High
2023-02-21	30	F	ICT	Bachelor	Others	Average	Yes	Yes	No	Yes	Yes	Yes	No	Yes	No	No	Systemic illness	No	No	Yes	Yes	No	No	No	Yes	No	No	Moderate
2023-02-21	37	F	ICT	Master	Others	Average	Yes	Yes	No	Yes	Yes	Yes	No	No	No	No	Systemic illness	Yes	No	Yes	Yes	Yes	No	No	No	No	No	Moderate
2023-02-21	25	F	ICT	Bachelor	Student	Average	Yes	Yes	No	Yes	No	No	No	No	No	No	Medications	No	No	Yes	Yes	No	No	No	No	No	No	Moderate
2023-02-21	26	M	ICT	Secondary	Others	Shopkeeper	Yes	Yes	No	No	Yes	No	No	No	No	No	Systemic illness	No	No	Yes	Yes	No	No	No	No	No	No	Moderate
2023-02-21	15	F	ICT	Secondary	Student	Student	Yes	Yes	No	No	No	Yes	No	No	No	No	Medications	No	No	Yes	Yes	Yes	No	No	No	No	No	Moderate
2023-02-21	28	F	ICT	Master	Others	Middle	Yes	Yes	No	Yes	No	No	No	No	No	No	Medications	No	No	Yes	Yes	Yes	No	No	No	No	No	Moderate
2023-02-21	38	F	ICT	Secondary	Others	Middle	Yes	Yes	No	Yes	Yes	No	No	No	No	No	Systemic illness	Yes	No	Yes	Yes	No	No	No	No	No	No	Moderate
2023-02-21	36	M	ICT	Bachelor	Others	Middle	Yes	Yes	No	Yes	Yes	No	No	No	No	No	Medications	Yes	No	Yes	Yes	No	No	No	No	No	No	High
2023-02-21	19	F	ICT	Bachelor	Student	Middle	Yes	Yes	No	No	No	No	No	No	No	No	Systemic illness	No	No	Yes	Yes	No	No	No	No	No	No	Moderate
2023-02-21	20	F	ICT	Bachelor	Student	Middle	Yes	Yes	No	Yes	No	Yes	No	No	No	No	Medications	No	No	Yes	Yes	Yes	No	No	Yes	No	No	Moderate
2023-02-21	37	F	ICT	Secondary	Student	Moderate	Yes	No	Yes	Yes	Yes	Yes	No	Yes	No	Yes	Systemic illness	Yes	Yes	Yes	Yes	No	No	Yes	No	Yes	Yes	Low
2023-02-21	22	M	ICT	Primary	Doctor	High	Yes	No	Yes	Yes	No	Yes	No	No	Yes	No	Medications	No	Yes	No	Yes	No	Yes	No	No	Yes	No	High
2023-02-21	26	F	ICT	Higher secondary	Engineer	Moderate	No	No	Yes	No	No	Yes	No	No	Yes	Yes	Medications	No	No	No	Yes	No	Yes	Yes	No	No	Yes	Low
2023-02-21	35	F	ICT	Primary	Student	high	No	Yes	No	Yes	No	Yes	Yes	No	No	Yes	Systemic illness	Yes	No	Yes	Yes	Yes	Yes	Yes	No	No	Yes	Low
2023-02-21	35	F	ICT	None	Others	Moderate	No	Yes	Yes	No	No	Yes	No	Yes	Yes	Yes	Systemic illness	No	No	No	Yes	Yes	Yes	Yes	No	No	Yes	Low
2023-02-21	37	M	ICT	Primary	Teacher	High	Yes	No	No	Yes	No	No	No	Yes	No	Yes	Systemic illness	No	No	No	Yes	yes	Yes	Yes	No	No	Yes	Low
2023-02-21	72	F	ICT	None	Teacher	High	No	No	No	No	No	No	No	Yes	No	Yes	Systemic illness	No	No	No	No	Yes	Yes	Yes	No	No	Yes	Low
2023-02-21	36	M	ICT	Primary	Lawyer	High	Yes	Yes	No	No	Yes	No	No	No	No	Yes	Medications	Yes	No	Yes	Yes	No	Yes	Yes	No	No	Yes	Low
2023-02-21	37	F	ICT	Secondary	Student	Low	No	Yes	Yes	Yes	Yes	Yes	Yes	No	Yes	Yes	Systemic illness	No	No	No	Yes	No	No	No	No	No	No	High
2023-02-21	45	F	GB	Primary	Teacher	high	No	No	Yes	No	No	No	No	No	No	Yes	Systemic illness	No	No	No	Yes	Yes	No	No	No	No	No	Moderate
2023-02-21	23	F	GB	Secondary	Student	Good	Yes	Yes	Yes	No	Yes	Yes	Yes	No	Yes	Yes	Systemic illness	No	No	No	Yes	No	No	No	No	No	No	High
2023-02-21	25	F	GB	Master	Teacher	Good	Yes	No	No	No	Yes	Yes	No	No	No	No	No	No	No	No	Yes	Yes	No	No	No	No	No	Moderate
2023-02-21	23	F	GB	Master	Student	Good	Yes	Yes	No	No	Yes	Yes	No	No	No	No	No	No	No	No	Yes	Yes	No	No	No	No	No	Moderate
2023-02-21	30	F	GB	Bachelor	Others	Good	Yes	Yes	No	No	Yes	Yes	Yes	No	No	No	No	No	No	Yes	Yes	No	No	No	No	No	No	Moderate
2023-02-21	11	F	GB	Primary	Student	Good	No	Yes	No	No	No	Yes	Yes	No	No	No	No	No	No	No	Yes	No	No	No	No	No	No	Low
2023-02-21	52	M	GB	Others	Others	Poor	Yes	Yes	Yes	Yes	Yes	Yes	Yes	No	Yes	Yes	No		Yes	No	Yes	No	No	No	No	No	No	High
2023-02-21	32	M	GB	Bachelor	Others	Good	No	No	Yes	No	No	Yes	Yes	No	No	Yes	No		Yes	No	Yes	No	No	No	No	No	No	High
2023-02-21	23	F	GB	Bachelor	Student	Good	No	No	Yes	No	No	No	Yes	No	Yes	Yes	No		No	Yes	Yes	Yes	Yes	Yes	Yes	Yes	Yes	Low
2023-02-21	16	F	GB	Bachelor	Student	Good	No	No	No	Yes	No	Yes	No	No	Yes	No	No	Yes	No	No	Yes	No	Yes	Yes	No	No	No	Moderate
2023-02-21	42	M	KPK	Ph.D	Student	Good	No	Yes	No	Yes	No	Yes	No	No	No	Yes	No	No	No	No	Yes	No	No	No	Yes	No	No	Moderate
2023-02-21	22	M	KPK	Bachelor	Student	Poor	No	Yes	No	Yes	No	No	Yes	No	Yes	No	No	Yes	No	No	Yes	No	No	No	No	No	No	Moderate
2023-02-21	26	M	KPK	Master	Student	Good	Yes	No	No	No	No	No	No	No	Yes	Yes	No	No	No	No	Yes	Yes	No	No	Yes	No	Yes	Moderate
2023-02-21	32	M	KPK	Secondary	Others	Poor	No	Yes	No	Yes	No	No	Yes	No	Yes	No	No	Yes	No	No	Yes	No	No	No	No	No	No	Moderate
2023-02-21	45	F	KPK	Sceondry	House wife	Poor	Yes	Yes	No	No	Yes	No	No	No	Yes	Yes	Yes	Yes	No	No	No	No	No	No	No	No	No	High
2023-02-21	40	F	KPK	None	Others	Poor	Yes	Yes	No	Yes	Yes	Yes	No	No	Yes	Yes	Yes	Yes	No	No	No	No	No	No	No	No	No	High
2023-02-21	60	F	PUNJAB	Higher secondary	Others	Middle	Yes	No	Yes	Yes	Yes	No	Yes	No	No	No	No	No	No	No	Yes	No	No	No	No	No	No	High
2023-02-21	22	F	PUNJAB	Secondary	Others	Poor	Yes	No	No	No	No	Yes	No	No	No	No	No	No	No	No	Yes	No	No	No	No	No	No	Moderate
2023-02-21	46	M	PUNJAB	Bachelor	Teacher	Middle	Yes	No	No	Yes	Yes	No	Yes	No	No	No	No	No	No	Yes	Yes	No	No	No	No	No	No	Moderate
2023-02-21	58	F	PUNJAB	None	Others	Middle Class/ Stable	Yes	Yes	No	Yes	No	Yes	Yes	No	No	No	No	Yes	No	No	Yes	Yes	No	No	No	No	Yes	Moderate
2023-02-21	40	F	PUNJAB	None	Others	Lower Middle Class/ Stable	Yes	Yes	No	Yes	No	No	No		No	No	No	No	No	No	Yes	No	No	No	No	No	No	Moderate
2023-02-21	42	M	PUNJAB	Bachelor	Others	Middle	Yes	Yes	Yes	Yes	Yes	Yes	Yes	No	Yes	Yes	Systemic illness	No	No	No	Yes	No	No	No	No	No	No	High
2023-02-22	27	M	PUNJAB	Bachelor	Student	Middle	Yes	No	Yes	No	No	No	Yes		Yes	No	Medications	Yes	No	No	Yes	No	No	No	No	No	Yes	Moderate
2023-02-22	27	M	PUNJAB	Secondary	Others	Middle	No	No	Yes	Yes	No	No	Yes	No	No	No	Medications	No	No	No	Yes	No	No	No	No	No	No	Low
2023-02-22	43	F	PUNJAB	Bachelor	Others	Middle	No	Yes	No	Yes	No	No	Yes	No	No	Yes	Medications	No	No	No	Yes	No	No	No	No	No	No	Moderate
2023-02-22	32	F	PUNJAB	Secondary	Others	Poor	No	No	Yes	No	Yes	No	No	Yes	No	Yes	Medications	No	No	No	No	No	No	No	No	No	No	Moderate
2023-02-22	29	F	PUNJAB	None	Others	Poor	Yes	No	Yes	Yes	Yes	No	Yes	Yes	No	Yes	Medications	No	No	Yes	No	No	Yes	No	No	No	Yes	Moderate
2023-02-22	32	F	PUNJAB	Secondary	Others	Poor	No	No	Yes	No	Yes	No	No	Yes	No	Yes	Medications	No	No	No	No	No	No	No	No	No	No	Moderate
2023-02-22	35	F	PUNJAB	Secondary	Teacher	Moderate	No	Yes	No	Yes	Yes	No	Yes	Yes	No	No	Systemic illness	Yes	Yes	No	Yes	No	No	No	No	Yes	Yes	Moderate
2023-02-22	27	M	PUNJAB	Bachelor	Student	Moderate	No	Yes	No	Yes	No	No	Yes	Yes	No	No	Medications	No	No	No	Yes	No	No	No	No	No	No	Moderate
2023-02-22	37	M	PUNJAB	Higher secondary	Teacher	High	No	Yes	Yes	No	No	Yes	Yes	Yes	Yes	No	Medications	No	No	No	Yes	Yes	No	No	Yes	Yes	No	High
2023-02-22	43	M	PUJNAB	Secondary	Others	Moderate	No	No	Yes	Yes	Yes	No	No	Yes	No	No	Medications	Yes	No	No	Yes	No	Yes	No	No	No	Yes	Moderate
2023-02-22	37	M	PUNJAB	Secondary	Doctor	high	No	Yes	No	Yes	No	Yes	No	Yes	No	No	Medications	Yes	No	Yes	No	Yes	No	No	No	Yes	Yes	High
2023-02-22	17	M	PUNJAB	Higher secondary	Student	Moderate	No	Yes	No	Yes	Yes	Yes	No	Yes	No	No	Medications	Yes	No	No	Yes	No	Yes	No	No	No	Yes	Moderate
2023-02-22	15	F	PUNJAB	Higher secondary	Student	Moderate	No	Yes	Yes	No	Yes	No	Yes	No	No	No	Medications	Yes	No	No	Yes	No	Yes	No	No	Yes	No	Moderate
2023-02-22	38	M	PUNJAB	None	Others	Poor	Yes	Yes	No	Yes	Yes	No	Yes	No	No	No	Medications	Yes	No	No	Yes	No	No	No	No	No	No	Moderate
2023-02-22	30	M	PUNJAB	None	Others	Good	Yes	Yes	No	No	Yes	No	No	No	No	No	Medications	No	No	No	Yes	No	No	No	No	No	Yes	Moderate
2023-02-22	25	M	PUNJAB	Master	Student	Good	Yes	No	No	Yes	Yes	Yes	No	No	No	No	Medications	No	No	No	Yes	No	No	No	No	No	No	Moderate
2023-02-22	65	F	PUNJAB	Primary	Others	Poor	Yes	Yes	No	Yes	Yes	No	Yes	No	No	No	Systemic illness	Yes	No	No	No	No	No	No	No	No	No	High
2023-02-22	35	M	PUNJAB	Secondary	Business man/woman	Good	Yes	No	No	Yes	No	No	No	No	No	No	Medications	No	No	No	Yes	No	No	No	No	Yes	No	Moderate
2023-02-22	46	M	PUNJAB	Secondary	Others	Poor	Yes	No	No	Yes	Yes	No	Yes	No	No	No	Medications	Yes	No	No	No	No	No	No	No	No	No	High
2023-02-22	60	F	BALOUCHISTAN	Bachelor	Others	Good	Yes	No	Yes	Yes	Yes	No	Yes	No	No	No	Systemic illness	Yes	No	No	No	No	No	No	No	No	No	High
2023-02-22	22	F	BALOUCHISTAN	Secondary	Others	Good	Yes	No	No	No	Yes	Yes	No	No	No	No	Medications	No	No	No	Yes	No	No	No	No	No	Yes	Moderate
2023-02-22	36	F	BALOUCHISTAN	Bachelor	Teacher	Moderate	Yes	No	Yes	Yes	Yes	No	Yes	No	Yes	No	Medications	Yes	No	No	Yes	No	No	No	No	No	Yes	High
2023-02-22	42	M	BALOUCHISTAN	None	Others	Poor	Yes	Yes	No	Yes	Yes	Yes	Yes	No	Yes	No	Medications	Yes	No	No	Yes	No	No	Yes	No	No	Yes	High
2023-02-22	36	M	BALOUCHISTAN	Bachelor	Business man/woman	Moderate	No	No	Yes	No	No	No	Yes	No	No	Yes	Medications	Yes	No	No	Yes	No	No	No	No	No	No	Moderate
2023-02-22	26	F	BALOUCHISTAN	Bachelor	Doctor	Good	No	No	Yes	Yes	Yes	Yes	Yes	Yes	Yes	No	Medications	No	No	No	Yes	Yes	No	Yes	No	Yes	No	Moderate
2023-02-22	16	F	BALOUCHISTAN	Higher secondary	Student	Good	Yes	No	No	No	Yes	No	No	No	Yes	No	No	No	No	No	Yes	No	No	No	No	No	No	Moderate
2023-02-22	55	F	BALOUCHISTAN	Higher secondary	Others	Good	No	No	No	No	No	No	No	No	No	No	No	No	No	No	Yes	No	No	No	No	No	No	Moderate
2023-02-22	37	F	BALOUCHISTAN	None	Others	Moderate	Yes	Yes	No	No	Yes	No	No	No	No	No	No	No	No	No	Yes	No	No	No	No	No	No	Moderate
2023-02-22	40	M	BALOUCHISTAN	None	Others	Poor	Yes	No	No	No	Yes	No	Yes	No	No	No	No	No	No	No	No	No	No	No	No	No	No	High
2023-02-22	25	M	BALOUCHISTAN	Higher secondary	Student	Moderate	Yes	Yes	No	No	Yes	Yes	Yes	No	No	No	No	No	No	No	Yes	No	No	No	No	No	No	Moderate
2023-02-22	41	F	BALOUCHISTAN	None	Others	Average	Yes	Yes	No	No	No	No	Yes	No	No	No	No	No	No	No	Yes	No	No	No	No	No	No	High
2023-02-22	55	F	BALOUCHISTAN	None	Others	Average	Yes	Yes	No	No		Yes	Yes	No	No	No	No	No	No	No	Yes	No	No	No	No	No	Yes	Moderate
2023-02-22	28	F	BALOUCHISTAN	Bachelor	Teacher	Good	Yes	No	No	No	Yes	Yes	No	Yes	No	No	No	No	No	No	Yes	No	No	No	No	No	No	Moderate
2023-02-22	38	F	BALOUCHISTAN	Primary	Others	Average	Yes	Yes	No	No	Yes	Yes	Yes	No	No	No	No	No	No	No	Yes	No	No	No	No	No	No	Moderate
2023-02-22	20	M	BALOUCHISTAN	Higher secondary	Student	Good	Yes	No	No	No	Yes	No	No	No	No	No	No	No	No	No	Yes	No	No	No	No	No	No	Moderate
2023-02-22	49	M	BALOUCHISTAN	None	Others	Average	Yes	Yes	No	No	No	Yes	Yes	No	No	No	No	No	No	No	No	No	No	No	No	No	Yes	Moderate
2023-02-22	50	F	BALOUCHISTAN	Primary	Others	Good	No	Yes	No	No	Yes	Yes	No	No	No	No	No	No	No	No	Yes	No	No	No	No	No	No	Moderate
2023-02-22	50	M	BALOUCHISTAN	None	Others	Poor	Yes	Yes	Yes	Yes	Yes	No	Yes	No	No	No	No	No	No	No	No	No	No	No	No	No	Yes	Low
2023-02-22	50	M	BALOUCHISTAN	None	Others	Poor	Yes	No	No	No	Yes	No	Yes	No	Yes	Yes	Systemic illness	No	No	No	No	No	No	No	No	Yes	No	High
2023-02-22	17	M	BALOUCHISTAN	None	Others	Good	Yes	Yes	No	Yes	Yes	No	Yes	No	No	No	Systemic illness	No	No	Yes	Yes	No	No	No	No	Yes	No	Moderate
2023-02-22	55	M	BALOUCHISTAN	None	Others	Poor	Yes	Yes	No	No	Yes	No	No	No	No	No	No	No	No	Yes	Yes	No	No	No	No	No	No	Moderate
2023-02-22	20	F	BALOUCHISTAN	Higher secondary	Student	Good	Yes	Yes	No	No	Yes	NO	No	No	No	No	No	No	No	Yes	Yes	No	No	No	No	No	No	Moderate
2023-02-24	15	F	ICT	Secondary	Student	Good	Yes	Yes	No	No	Yes	No	No	No	No	No	No	No	No	Yes	Yes	No	No	No	No	No	No	Moderate
2023-02-24	24	F	ICT	Bachelor	Student	Good	No	No	No	No	Yes	Yes	Yes	No	No	No	No	No	No	Yes	Yes	No	No	No	No	No	No	Moderate
2023-02-24	29	F	ICT	Bachelor	Doctor	Good	Yes	No	No	No	No	No	No	No	No	No	No	No	Yes	Yes	Yes	No	No	No	No	No	No	Moderate
2023-02-24	37	M	GB	Bachelor	Teacher	Good	Yes	Yes	No	No	Yes	No	No	No	No	No	No	No	No	No	Yes	No	No	No	No	No	No	Moderate
2023-02-24	50	F	GB	None	Others	Average	Yes	No	No	No	Yes	No	No	No	No	No	No		No	Yes	Yes	No	No	No	No	No	No	Moderate
2023-02-24	38	M	GB	Higher secondary	Others	middle class	Yes	Yes	No	No	Yes	Yes	No	No	No	Yes	Medications	No	No	No	Yes	No	No	No	No	No	No	Moderate
2023-02-24	34	F	GB	Bachelor	Teachers	Good	Yes	Yes	Yrs	Yes	No	Yes	Yes	No	No	No	No	Yes	No	Yes	Yes	No	No	No	No	No	No	Extreme High
2023-02-24	45	M	GB	Master	Lawyer	Good	Yes	Yes	Yes	Yes	No	Yes	Yes	No	No	No	No	Yes	No	No	Yes	No	Yes	No	No	No	No	High
2023-02-24	30	M	ICT	Higher secondary	Businessman	Good	Yes	Yes	Yes	Yes	No	Yes	Yers	No	No	No	No	Yes	No	Yes	Np	No	No	No	No	No	No	High
2023-02-24	23	F	ICT	Higher secondary	Teacher	Good	Yes	No	Yes	No	Yes	Yes	Yes	No	Yes	Yes	Medications	No	No	Yes	No	Yes	No	Yes	No	No	Yes	High
2023-02-24	22	M	ICT	Secondary	Business man/woman	Stable/ Middle Class	Yes	Yes	No	Yes	Yes	Yes	Yes	Yes	No	No	No	No	No	Yes	No	No	No	No	No	No	No	Extremely high
2023-02-24	21	F	ICT	Higher secondary	Student	Satisfactory	Yes	Yes	Yes	Yes	Yes	Yes	Yes	No	No	No	No	No	No	No	No	No	No	No	No	No	No	Extremely high
2023-02-24	32	M	ICT	Bachelor	Business man/woman	Satisfactory	Yes	No	No	No	No	Yes	Yes	No	Yes	Yes	Systemic illness	No	No	No	Yes	No	No	No	Yes	No	Yes	Moderate
2023-02-24	56	M	ICT	Secondary	Business man/woman	Lower Middle Class/ Stable	Yes	Yes	No	Yes	No	No	No	No	No	No	No	Yes	No	No	No	No	No	No	No	No	No	High
2023-02-24	60	M	ICT	Secondary	Others	Lower Middle Class/Stable	Yes	Yes	No	Yes	No	Yes	No	Yes	No	No	No	No	No	No	No	No	No	No	No	No	No	Moderate
2023-02-24	25	F	GB	Bachelor	Teacher	Satisfactory	Yes	Yes	No	Yes	No	Yes	Yes	No	No	No	No	No	No	Yes	No	No	No	No	No	Yes	Yes	Moderate
2023-02-24	64	M	GB	Secondary	Others	Low	No	No	No	No	Yes	Yes	No	No	No	No	No	Yes	Yes	No	No	No	No	No	No	No	No	Moderate
2023-02-24	39	F	ICT	Bachelor	Teacher	Middle	Yes	Yes	No	No	Yes	Yes	No	No	No	Yes	Systemic illness	No	No	No	No	No	No	No	No	No	No	Moderate
2023-02-24	7	M	GB	Primary	Student	Middle	No	Yes	Yes	No	No	Yes	Yes, No	No	No	No	No	No	No	Yes	Yes	Yes	Yes	Yes	Yes	Yes	Yes	Low
2023-02-24	38	F	GB	Others	Doctor	Middle	No	Yes	Yes	Yes	No	No	Yes	No	No	No	No	No	No	Yes	Yes	Yes	Yes	Yes	No	No	Yes	Low
2023-02-24	6	M	GB	Primary	Student	High	No	No	No	No	No	Yes	No	No	No	No	No	No	No	Yes	Yes	No	No	No	No	No	Yes	Low
